1 **Title: Deficiency in endocannabinoid synthase *DAGLB* contributes to**  
2 **Parkinson's disease and dopaminergic neuron dysfunction**

3 **Running title: Endocannabinoid deficiency contributes to Parkinson's disease**

4 **Authors:** Zhenhua Liu<sup>1,2,\*</sup>, Nannan Yang<sup>1,2,\*</sup>, Jie Dong<sup>1,3,\*</sup>, Wotu Tian<sup>1,4</sup>, Lisa Chang<sup>1</sup>, Jinghong  
5 Ma<sup>5</sup>, Jifeng Guo<sup>2</sup>, Jieqiong Tan<sup>6</sup>, Ao Dong<sup>7,8,9</sup>, Kaikai He<sup>7,8</sup>, Jingheng Zhou<sup>10</sup>, Resat Cinar<sup>11</sup>,  
6 Junbing Wu<sup>1</sup>, Armando Salinas<sup>12</sup>, Lixin Sun<sup>1</sup>, Justin Kung<sup>1</sup>, Chengsong Xie<sup>1,^</sup>, Braden Oldham<sup>1</sup>,  
7 Mantosh Kumar<sup>1</sup>, Sarah Hawes<sup>1</sup>, Jinhui Ding<sup>13</sup>, Lupeng Wang<sup>1</sup>, Tao Wang<sup>14</sup>, Piu Chan<sup>5</sup>,  
8 Zhuohua Zhang<sup>6,15,16</sup>, Weidong Le<sup>3</sup>, Shengdi Chen<sup>4</sup>, David M. Lovinger<sup>12</sup>, Guohong Cui<sup>10</sup>,  
9 Yulong Li<sup>7,8,9,17</sup>, Huaibin Cai<sup>1,#</sup>, and Beisha Tang<sup>2,6,18,#</sup>

10 **Affiliations:** <sup>1</sup>Transgenic Section, Laboratory of Neurogenetics, National Institute on Aging,  
11 National Institutes of Health, Bethesda, MD 20892, U.S.A.

12 <sup>2</sup>Department of Neurology, Xiangya Hospital, Central South University, Changsha, Hunan  
13 410008, China

14 <sup>3</sup>Clinical Research Center on Neurological Diseases, the First Affiliated Hospital, Dalian  
15 Medical University, Dalian, Liaoning, 116011, China

16 <sup>4</sup>Department of Neurology, Ruijin Hospital Affiliated to Shanghai Jiao Tong University School  
17 of Medicine, Shanghai 20025, China

18 <sup>5</sup>Department of Neurology, Xuanwu Hospital of Capital Medical University, Beijing 100053,  
19 China

20 <sup>6</sup>Centre for Medical Genetics and Hunan Key Laboratory of Medical Genetics, School of Life  
21 Sciences, Central South University, Changsha, Hunan 410008, China

22 <sup>7</sup>State Key Laboratory of Membrane Biology, Peking University School of Life Sciences,  
23 Beijing 100871, China

- 24 <sup>8</sup>PKU-IDG/McGovern Institute for Brain Research, Beijing 100871, China
- 25 <sup>9</sup>Peking-Tsinghua Center for Life Sciences, Academy for Advanced Interdisciplinary Studies,  
26 Peking University, Beijing 100871, China
- 27 <sup>10</sup>In Vivo Neurobiology Group, Neurobiology Laboratory, National Institute of Environmental  
28 Health Sciences, Research Triangle Park, NC 27709, U.S.A.
- 29 <sup>11</sup>Laboratory of Physiologic Studies, National Institute on Alcohol Abuse and Alcoholism,  
30 National Institutes of Health, Bethesda, MD 20892, U.S.A.
- 31 <sup>12</sup>Laboratory for Integrative Neuroscience, National Institute on Alcohol Abuse and Alcoholism,  
32 National Institutes of Health, Rockville, MD, 20852, USA.
- 33 <sup>13</sup>Computational Biology Group, Laboratory of Neurogenetics, National Institute on Aging,  
34 National Institutes of Health, Bethesda, MD 20892, U.S.A.
- 35 <sup>14</sup>Department of Neurology, Union Hospital, Tongji Medical College, Huazhong University of  
36 Science and Technology, Wuhan, Hubei 430022, China
- 37 <sup>15</sup>Centre for Medical Genetics and Hunan Key Laboratory of Medical Genetics, School of Life  
38 Sciences, Central South University, Changsha, Hunan 410008, China
- 39 <sup>16</sup>Department of Neurosciences, University of South China Medical School, Hengyang, China
- 40 <sup>17</sup>Chinese Institute for Brain Research, Beijing 102206, China
- 41 <sup>18</sup>National Clinical Research Center for Geriatric Disorders, Xiangya Hospital, Central South  
42 University, Changsha, Hunan 410008, China
- 43
- 44 \*These three authors contributed equally to this work.
- 45 ^Dr. Chengsong Xie died from stomach cancer in October 2020.

46 #Co-corresponding authors: Dr. Beisha Tang, Department of Neurology, Xiangya Hospital,  
47 Central South University, Changsha, Hunan 410008, China. E-mail: bstang7398@163.com; and  
48 Dr. Huaibin Cai, Transgenics Section, Laboratory of Neurogenetics, National Institute on Aging,  
49 National Institutes of Health, Building 35, Room 1A112, MSC 3707, 35 Convent Drive,  
50 Bethesda, MD 20892–3707, USA. Tel: +1 3014028087; Fax: +1 3014802830; Email:  
51 caih@mail.nih.gov.

52

53 **Abstract**

54 **2-arachidonoyl-glycerol (2-AG), the most abundant endocannabinoid (eCB) in the brain,**  
55 **regulates diverse neural functions. However, whether 2-AG deficiency contributes to**  
56 **Parkinson's disease (PD) and nigral dopaminergic neurons (DANs) dysfunction is unclear.**  
57 **Diacylglycerol lipase  $\alpha$  and  $\beta$  (*DAGLA* and *DAGLB*) mediate the biosynthesis of 2-AG.**  
58 **Using homozygosity mapping and whole-exome sequencing, we linked multiple**  
59 **homozygous loss-of-function mutations in *DAGLB* to a form of early-onset autosomal**  
60 **recessive PD. We then used RNA sequencing and fiber photometry with genetically**  
61 **encoded eCB sensors to demonstrate that *DAGLB* is the main 2-AG synthase in nigral**  
62 **DANs. Genetic knockdown of *Daglb* by CRISPR/Cas9 in mouse nigral DANs substantially**  
63 **reduces 2-AG levels in the *substantia nigra* (SN). The SN 2-AG levels are markedly**  
64 **correlated with the vigor of movement during the acquisition of motor skills, while *Daglb*-**  
65 **deficiency impairs motor learning. Conversely, pharmacological enhancement of 2-AG**  
66 **levels increases nigral DAN activity and dopamine release and improves motor learning.**  
67 **Together, we demonstrate that *DAGLB*-deficiency contributes to the etiopathogenesis of**  
68 **PD, reveal the importance of *DAGLB*-mediated 2-AG biosynthesis in nigral DANs in**  
69 **regulating neural activity and dopamine release, and provide preclinical evidence for the**  
70 **beneficial effects of 2-AG augmentation in PD treatment.**

71

72 **Keywords**

73 Parkinson's disease, substantia nigra, dopaminergic neurons, endocannabinoid, diacylglycerol  
74 lipase  $\beta$ , 2-arachidonoyl-glycerol, motor skill learning, motor control, genetics, pathophysiology

75

76 **Introduction**

77 Parkinson's disease (PD) is clinically manifested with both motor and non-motor symptoms <sup>1</sup>. A  
78 preferential degeneration of nigral dopaminergic neurons (DANs) in the ventral *substantia nigra*  
79 *pars compacta* (SNc) and the resulting impairments of dopamine transmission in basal ganglia  
80 are broadly responsible for the motor symptoms, which include bradykinesia, resting tremor,  
81 rigidity, and motor skill learning deficits <sup>2,3</sup>. Both genetic and environmental factors contribute to  
82 the etiopathogenesis of PD. The identification of monogenetic mutations responsible for various  
83 familial forms of PD provide molecular clues in understanding the pathophysiological  
84 mechanisms of the disease <sup>4</sup>. To date, more than 20 genes have been linked to the familial forms  
85 of Parkinsonism, including both autosomal dominant and recessive mutations <sup>5</sup>. However, a  
86 significant proportion of familial PD cases are still genetically unexplained. Identifying those  
87 unknown genetic factors may uncover new signaling pathways critical for regulating nigral DAN  
88 activity and PD pathogenesis.

89  
90 The nigral DANs are essential in regulating the vigor of movement <sup>6</sup> and motor learning <sup>7</sup>. The  
91 activity of nigral DANs and dopamine release can be dynamically regulated by diverse  
92 presynaptic inputs, of which the direct pathway striatal spiny projection neurons (dSPNs) in  
93 dorsal striatum provide the major inhibitory inputs <sup>7-11</sup>. High levels of cannabinoid receptor 1  
94 (CB1) are present in the axon terminals of dSPNs <sup>12,13</sup>, which may respond to the  
95 endocannabinoid (eCB) 2-arachidonoyl-glycerol (2-AG) and anandamide (AEA) released from  
96 the nigral DANs. The eCBs act as neuromodulators, retrogradely suppress presynaptic  
97 neurotransmitter release through the G protein-coupled CB1 receptors, and regulate a variety of  
98 physiological processes, such as motor learning, stress response, and memory <sup>14-18</sup>. The midbrain

99 DANs can produce and release eCBs from soma and dendrites<sup>19</sup>. Both diacylglycerol lipase  $\alpha$   
100 (DAGLA) and its homologue DAGLB mediate the biosynthesis of 2-AG, the most abundant  
101 eCB in the brain<sup>20</sup>. While DAGLA catalyzes most of the 2-AG production in the brain<sup>21-23</sup>, the  
102 main 2-AG synthase in nigral DANs remains to be determined. Confounding upregulation and  
103 downregulation of eCBs and receptors have been observed in the basal ganglia of PD patients  
104 and related animal models<sup>17,24,25</sup>. However, it is unclear whether the altered eCB signaling  
105 contributes to the disease or merely reflects compensatory responses. To understand how eCB  
106 system regulates dopamine transmission in motor control may provide new insights into the  
107 pathogenic mechanisms and treatment of PD.

108

109 In supporting a critical involvement of eCB signaling in regulating nigral DAN activity and PD  
110 pathogenesis, here we first provided genetic evidence to demonstrate that deficiency in 2-AG  
111 synthase *DAGLB* contributes to the etiopathogenesis of PD. We then revealed a previously  
112 undescribed, nigral DAN-specific pathogenic mechanism of *DAGLB* dysfunction in motor  
113 learning. Finally, we showed that pharmacological augmentation of 2-AG levels may serve as a  
114 potential therapeutic treatment for PD.

115

## 116 **Results**

### 117 **Identification of *DAGLB* mutations in patients with early-onset autosomal recessive PD**

118 Previously, we recruited a large cohort of patients with autosomal recessive PD (ARPD) and  
119 sporadic early-onset PD (EOPD) in China and identified pathogenic variants of known PD genes  
120 in 65 ARPD families using exon dosage analysis and whole-exome sequencing (WES)<sup>26</sup>. To  
121 discover new causal genetic mutations in the remaining ARPD families, we first studied one

122 consanguineous family (Family 1, AR-003) with two siblings affected by EOPD (**Fig. 1A**).

123 Genome-wide single nucleotide polymorphism (SNP) analysis and homozygosity mapping of the

124 affected individuals revealed five regions of homozygosity shared by the affected sisters (II-3

125 and II-4) as the candidate causative gene regions (**Supplementary Table S1, Supplementary**

126 **Fig. S1**). Assuming recessive mode of inheritance, we then analyzed the WES data from those

127 two affected siblings and searched for shared homozygous mutations. Consequently, we

128 identified one homozygous splice-site mutation (c.1821-2A>G) residing in intron 14 of *DAGLB*

129 confirmed by Sanger sequencing and segregated with disease in this family (**Fig. 1A,**

130 **Supplementary Tables S2 and S3, Supplementary Fig. S2**). The "c.1821-2A>G" mutation was

131 predicted in silico to disrupt the donor splice site of exon 15 and confirmed by reverse-

132 transcription PCR analysis (**Supplementary Fig. S3**). Next, we analyzed the *DAGLB* gene for

133 homozygous or compound heterozygous mutations by mining the WES data from an additional

134 1,654 unrelated PD probands, including 156 ARPD and 1,498 sporadic EOPD cases without

135 known PD-related genetic mutations. Accordingly, we identified one homozygous missense

136 mutation [c.1088A>G (p.D336G)] in Family 2 (AR-005) and one homozygous frameshift

137 mutation [c.469dupC (p.L158Sfs\*17)] in Family 4 (**Fig. 1A, Supplementary Tables S2 and S3,**

138 **Supplementary Fig. S2**). Genome-wide SNP array genotyping also showed homozygosity

139 present in the affected cases from Families 2 and 4, which include the *DAGLB* gene

140 (**Supplementary Fig. S1**). Finally, we performed copy number variation analysis of the WES

141 data and identified one more homozygous deletion (g.ch7:6,486,383-6,489,136del), which

142 contains the entire exon 1 and 5'-untranslated region of *DAGLB* gene in another family with two

143 affected siblings (Family 3, AR-075) and was validated through Oxford Nanopore long-read

144 sequencing and Sanger sequencing (**Fig. 1A, Supplementary Figs. S4 and S5**). These *DAGLB*

145 mutations are absent from or present in the heterozygous state in available unaffected family  
146 members and healthy control subjects, strongly supporting the pathogenicity of homozygous  
147 *DAGLB* mutations in EOPD. Those six affected individuals had early disease onset ( $\leq 40$  years  
148 old) and displayed typical parkinsonism and good levodopa response (**Supplementary Table S4,**  
149 **Supplementary Clinical description**). However, compared to patients with PD-related *PRKN*,  
150 *PINK1* or *DJ-1* recessive mutations, *DAGLB* mutation-affected individuals showed more severe  
151 motor manifestations and more non-motor signs, such as depression. Positron emission  
152 tomography (PET) revealed impaired dopamine transmission in the striatum (**Supplementary**  
153 **Fig. S6**). Together, we identified four different homozygous *DAGLB* mutations in six affected  
154 EOPD individuals. *DAGLB* is the fourth most frequent ARPD gene after *PRKN*, *PINK1* and  
155 *PLA2G6* in our large Chinese APRD cohort <sup>26</sup>.

156

### 157 **The PD-related mutations disrupt the formation and stability of DAGLB proteins**

158 *DAGLB* encodes a 672-amino acid protein containing four transmembrane domains and one  
159 catalytic domain that mediates the biosynthesis of 2-AG <sup>23</sup>. The "g.ch7:6,486,383-6,489136del"  
160 and "c.469dupC" mutations apparently disrupt the translation of the catalytic domain (**Fig. 1B**),  
161 resulting in loss-of-function of DAGLB. By contrast, the "c.1821-2A>G" mutation truncates part  
162 of the catalytic domain, while the "c.1088A>G" mutation replaces a conserved aspartate (D)  
163 residue with glycine (G) in the catalytic domain (**Fig. 1B, Supplementary Fig. S7**). To  
164 investigate how the two missense mutations affect the expression of DAGLB protein, we  
165 examined the expression of DAGLB protein and *DAGLB* mRNA in primary fibroblasts derived  
166 from patients carrying the mutations. Compared to the healthy controls (HC), DAGLB protein  
167 was barely detectable by western blot in the patients' samples [1way ANOVA, F(4, 10)=33.1,



168  $p < 0.0001$ ] (**Fig. 1C, D**). In contrast, the *DAGLB* mRNA expression is comparable between the  
169 patients and control samples [1way ANOVA,  $F(4, 10) = 2.3$ ,  $p = 0.12$ ] (**Fig. 1E**), suggesting that  
170 the mutations affect the stability of DAGLB protein. Indeed, treatment with proteasome inhibitor  
171 MG132 increased the levels of DAGLB protein in both control and patients' samples  
172 (**Supplementary Fig. S8A, B**). Additionally, the mutations did not affect the expression of  
173 DAGLA protein in patients' samples (**Supplementary Fig. S8C, D**). Therefore, all four PD-  
174 related mutations disrupt the formation or stability of DAGLB protein, suggesting that the  
175 impairment of *DAGLB*-mediated 2-AG signaling may contribute to the etiopathogenesis of PD.

176

### 177 ***DAGLB* is the main 2-AG synthase expressed in nigral DANs**

178 While our human genetic studies linked deficiency in *DAGLB* to PD (**Fig. 1**), *DAGLA* is the  
179 main 2-AG synthesis in the CNS and account for 80% production of 2-AG in the mouse brains  
180 <sup>21,22</sup>. How does the *DAGLB*-deficiency contribute to PD and nigral DAN dysfunction?  
181 Interestingly, a previous whole genome RNA-sequencing study <sup>27</sup> revealed 10-fold more  
182 abundance of *DAGLB* than *DAGLA* mRNA in laser capture microdissection (LCM)-isolated  
183 human nigral DANs (**Fig. 2A**, unpaired *t* test,  $p < 0.0001$ , plotted from GSE76514). We then  
184 performed RNA-sequencing of LCM-isolated mouse nigral DANs and found that the expression  
185 of *Daglb* mRNA is 2-fold higher than *Dagla* (unpaired *t* test,  $p < 0.0001$ ) (**Fig. 2B**). By contrast,  
186 *Dagla* mRNA was more enriched in striatal neurons than *Daglb* (unpaired *t* test,  $p < 0.0001$ ) (**Fig.**  
187 **2C**). To determine the cellular location of DAGLB protein in nigral DANs, we tested the  
188 commercially available DAGLB antibodies. Unfortunately, none of them stained midbrain  
189 DANs. However, RNAscope<sup>®</sup> *in situ* hybridization demonstrated the co-localization of *Daglb*  
190 and *Dagla* mRNA with the dopamine synthase *tyrosine hydroxylase* (*Th*) in mouse nigral DANs

191 (Fig. 2D, Supplementary Fig. S9), Therefore, while *DAGLA* is highly expressed by most  
192 neurons in the brain<sup>21-23</sup>, *DAGLB* is the main 2-AG synthase expressed by nigral DANs,  
193 suggesting a nigral DAN-specific mechanism of *DAGLB*-deficiency in PD.

194

### 195 *Daglb*-knockdown in nigral DANs reduces 2-AG levels in the SN

196 To examine the functional significance of *DAGLB*, we decided to selectively knockdown (KD)  
197 *Daglb* or *Dagla* in nigral DANs using an adeno-associated virus (AAV)-based CRISPR/SaCas9  
198 genome editing system (AAV-CMV-DIO-SaCas9-U6-sgRNA)<sup>28</sup>. The control (Ctrl) saCas9  
199 empty (referred to as the AAV-Ctrl) and saCas9 with the *Daglb* or *Dagla*-guided sgRNA  
200 (referred to as the AAV-*Daglb* KD and AAV-*Dagla* KD) are expressed in a Cre-dependent  
201 manner (Fig. 3A). Co-transfection of AAV-Cre and AAV-*Daglb* KD vectors led to substantial  
202 reduction of *DAGLB* protein levels but not *DAGLA* in primary cultured mouse cortical and  
203 hippocampal neurons, while co-transfection of AAV-Cre and AAV-*Dagla* KD vectors  
204 specifically suppressed the expression of *DAGLA* protein (Fig. 3B-D). Therefore, we developed  
205 *Daglb*- and *Dagla*-specific genetic KD AAV vectors to selectively manipulate the levels of  
206 *Daglb* and *Dagla* expression in a cell-type dependent manner.

207

208 To measure 2-AG release in the SN *in vivo*, we stereotactically injected the AAVs carrying a  
209 genetically encoded eCB sensor named eCB2.0<sup>29,30</sup> in the dorsal striatum (Fig. 3E, F). A  
210 custom-built fiber photometry system<sup>31</sup> was employed to capture the eCB2.0 signals in the  
211 dSPN-projecting *substantia nigra pars reticulata* (SNr) area (Fig. 3E), where the axons of  
212 dSPNs and dendrites of DANs form synaptic connections<sup>10,13</sup>. The infusion of control (Ctrl)-,  
213 *Daglb* KD- or *Dagla* KD-AAVs in the SNc of DAT<sup>TIRESCre</sup> mice leads to selective expression of

214 either saCas9 empty (referred to as DAN-Ctrl) or saCas9 with the *Daglb*- or *Dagla*-sgRNA  
215 (referred to as DAN-*Daglb* KD or *Dagla* KD) in the DANs (**Fig. 3E**). Overall, around 75% of  
216 DANs in the SNc were infected with AAV-Ctrl or AAV-*Daglb* KD, while no apparent loss of  
217 nigral DANs was observed in the DAN-*Daglb* KD mice 12 months after AAV injection  
218 (**Supplementary Fig. S10A-D**).

219

220 The eCB2.0 sensor was constructed based on CB1 receptors, of which the third intracellular loop  
221 is replaced with circularly permuted green fluorescent protein (cpGFP) and the binding of 2-AG  
222 and AEA enhances the emission intensity of cpGFP<sup>29</sup> (**Fig. 3F**). Like the native CB1 receptor,  
223 eCB2.0 sensors were transported to the dSPN axon terminals in the SN (**Fig. 3G**). The AAVs  
224 carrying red fluorescent protein tdTomato (tdT) were co-injected with AAV-eCB2.0 as a  
225 reference for adjusting any motion artifacts during the imaging process<sup>31</sup>. Two distinct emission  
226 peaks corresponding to the eCB2.0 and tdT signals were detected in the SNr immediately before  
227 and 120 min after the administration of JZL184 (16mg/kg), a selective monoacylglycerol lipase  
228 inhibitor<sup>32</sup> that blocks the degradation of 2-AG (**Fig. 3H**). The JZL184-induced enhancement of  
229 eCB2.0 signals was substantially diminished in the DAN-*Daglb* KD mice compared to the  
230 controls in both time- and dose-dependent manners [time: 2way ANOVA,  $F(7,42)=60.3$ ,  
231  $p<0.0001$ ; dose: 2way ANOVA,  $F(3,18)=66.7$ ,  $p<0.0001$ ] (**Fig. 3I, J**). Furthermore, liquid  
232 chromatography-tandem mass spectrometry (LC-MS/MS) also revealed a marked reduction of 2-  
233 AG levels in the SNc of DAN-*Daglb* KD mice (unpaired *t* test,  $p=0.01$ ) (**Fig. 3K**). By contrast,  
234 genetic deletion of *Dagla* in the SN DANs did not affect the JZL184-induced enhancement of  
235 eCB2.0 signals in the SNr (**Supplementary Fig. S11**). Together, these results demonstrate that  
236 DAGLB is the dominant 2-AG synthase that catalyzes the 2-AG production in nigral DANs.

237 **The nigral 2-AG levels correlate with motor performance during motor skill learning**

238 Our recent study demonstrates that ablation of nigral DANs in mouse models only modestly  
239 reduced the walking speed, but completely abolished the improvement of motor performance in  
240 rotarod motor skill learning test<sup>7,33</sup>, revealing a critical involvement of nigral DAN activity in  
241 motor skill learning. We thereby examined the 2-AG signals in the SNr by simultaneously  
242 conducting fiber photometry live recording and the rotarod training, 10 trials per session on each  
243 day for six consecutive days (**Fig. 4A**). Each trial started with a low constant rotating speed at 4  
244 rpm for 30 sec before linear acceleration from 4 to 40 rpm in 5 min<sup>34</sup>. The 2-AG signals  
245 gradually increased along with the progression of 10 trials during each training session (**Fig. 4A,**  
246 **B, Supplementary Fig. S12**). In addition, more robust daily enhancement of 2-AG levels was  
247 recorded on the first four days' training compared to the last two days' [1way ANOVA,  
248  $F(5,42)=12.2$ ,  $p<0.0001$ ] (**Fig. 4C**). The first four days' training is generally regarded as the  
249 acquisition phase of motor learning, while the last two days are regarded as the maintenance or  
250 retention phase<sup>35,36</sup>. As expected, rotarod performance was also greatly improved during the  
251 acquisition phase, but not in the retention phase (**Fig. 4D**). Indeed, further correlational analyses  
252 reveal stronger positive correlations between the 2-AG signal enhancement and rotarod  
253 performance in the acquisition phase compared to the retention phase [1way ANOVA,  
254  $F(5,42)=16.9$ ,  $p<0.0001$ ] (**Fig. 4E**). These results suggest that the SN 2-AG signaling is  
255 particularly engaged with the vigor of movement during the acquisition phase of motor skill  
256 learning.

257

258 ***Daglb*-knockdown in the nigral DANs compromises the dynamic 2-AG release during the**  
259 **early phase of motor skill learning and impairs the overall motor performance**

260 To further examine the contribution of *Daglb*-mediated 2-AG biosynthesis in the nigral DAN-  
261 dependent motor skill learning, we selectively knock-downed the expression of *Daglb* in nigral  
262 DANs of 3-month-old DAT<sup>IRESCre</sup> mice by AAV vectors and compared the SN 2-AG levels in  
263 DAN-Ctrl and DAN-*Daglb* KD mice during rotarod tests (**Fig. 5A**). The increase of eCB2.0  
264 signals was less robust in the SN of DAN-*Daglb* KD mice compared to the DAN-Ctrl ones,  
265 especially in the acquisition phase of motor learning [2way ANOVA, genotype: F(1, 8)=13.68,  
266 p=0.006] (**Fig. 5A**). Correlatively, the DAN-*Daglb* KD mice displayed marked impairments in  
267 the overall performance of rotarod motor learning tests compared to the control mice [2way  
268 ANOVA, genotype: F(1,30)=9.3, p=0.0047] (**Fig. 5B**). By contrast, there were no apparent  
269 alterations of spontaneous locomotor activity nor gait properties of DAN-*Daglb* KD mice  
270 compared to the controls (**Supplementary Fig. S13**). Together, these results demonstrate that the  
271 DAGLB-mediated 2-AG biosynthesis in the nigral DANs is actively engaged in regulating the  
272 functional role of nigral DANs in motor skill learning.

273  
274 We next examined whether CB1 receptors in the axon terminals of dSPNs mediate the retrograde  
275 2-AG signaling during motor skill learning. To selectively delete the CB1 receptor-encoding  
276 *Cnr1* gene in the dSPNs, we crossbred a line of *Cnr1*-floxed (*Cnr1*<sup>fl/fl</sup>) mice<sup>38</sup> with dopamine  
277 receptor 1-Cre (*Drd1*-Cre) mice. Accordingly, the expression of CB1 receptors was completely  
278 abolished in the SNr of *Drd1*-Cre/*Cnr1*<sup>fl/fl</sup> bigenic mice (**Fig. 5C**). Similarly to the DAN-*Daglb*  
279 KD mice, the *Drd1*-Cre/*Cnr1*<sup>fl/fl</sup> mice also displayed impairments in rotarod motor skill learning  
280 compared to the littermate controls [2way ANOVA, genotype: F(1, 24)=6.301, p=0.0192] (**Fig.**  
281 **5D**). Therefore, the nigral DAN-derived 2-AG likely regulates motor learning through  
282 modulating the presynaptic inputs from dSPNs.

283 ***Daglb* germline knockout mice do not developed any overt motor behavioral and**  
284 **neuropathological abnormalities.**

285 Like *DAGLB*, the loss-of-function mutations in *PARKIN*, *DJ-1*, and *PINK1* also contribute to the  
286 etiopathogenesis of PD <sup>5</sup>. However, the *Parkin*, *Dj-1*, and *Pink1* germline knockout (KO) mice  
287 did not develop any overt PD-related behavioral and neuropathological abnormalities <sup>37</sup>.

288 Similarly, we did not observe any apparent alterations of locomotor activity in *Daglb* germline  
289 KO mice at 4, 8, 12, and 20 months of age (**Supplementary Fig. S14A-C**). Since the rotarod  
290 motor learning test provides a more sensitive behavioral paradigm to detect the dysfunction of  
291 nigral DANs <sup>7</sup>, we examined the rotarod performance of *Daglb* germline KO mice at 4 and 20  
292 months of age. The 4-month-old *Daglb* KO mice displayed modest but statistically insignificant  
293 improvement of motor learning [2way ANOVA, genotype:  $F(1, 19)=2.9$ ,  $p=0.103$ ]  
294 (**Supplementary Fig. S14D**), while the 20-month-old *Daglb* KO mice showed similar  
295 performance compared to the littermate controls [2way ANOVA, genotype:  $F(1, 19)=0.02$ ,  
296  $p=0.899$ ] (**Supplementary Fig. S14E**). Additionally, no apparent loss of TH-positive nigral  
297 DANs was found in the 20-month-old *Daglb* KO mice [Unpaired *t* test,  $p=0.9989$ ]  
298 (**Supplementary Fig. S14F**). Therefore, the CRISPR/SaCas9-mediated acute knockdown of  
299 *Daglb* in the nigral DANs of adult mice provide a more sensitive experimental paradigm to  
300 evaluate the contribution of DAGLB-dependent 2-AG signaling in nigral DANs during motor  
301 learning.

302

303 **2-AG signaling potentiates nigral DAN activity and somatodendritic dopamine release.**

304 Since 2-AG from nigral DANs acts on the presynaptic CB1 receptors to suppress the release of  
305 inhibitory neurotransmitter GABA from dSPN axon terminals <sup>19</sup>, we suspected that the JZL184-

306 induced 2-AG upregulation in the SN (**Fig. 3I, J**) may disinhibit the presynaptic inhibitory inputs  
307 from dSPNs and lead to enhanced DAN activity and somatodendritic dopamine release. To test  
308 this hypothesis, we first treated the mice with JZL184, and then used fiber photometry with  
309 genetically encoded calcium indicator GCaMP6f<sup>39</sup> and dopamine indicator DA2m<sup>40</sup> to monitor  
310 the DAN activity and somatodendritic dopamine release. To examine the DAN calcium  
311 transients, we crossbred DAT<sup>IRESCre</sup>, Ai95 (RCL-GCaMP6f) and Ai9 (RCL-tdT) mice to  
312 selectively express GCaMP6f and tdT in the midbrain DANs of DAT<sup>IRESCre</sup>/GCaMP6f/tdT  
313 trigenic mice, and then stereotaxically injected AAV-Ctrl or AAV-*Daglb* KD vectors in the SNc  
314 of trigenic mice to evaluate the role of DAGLB in regulating DAN activity (**Fig. 6A, B**). The  
315 intraperitoneal injection of JZL184 (20 mg/kg) led to substantial increase of DAN activity as  
316 indicated with the elevated GCaMP6f signal intensities in the SNc of both DAN-Ctrl [2way  
317 ANOVA, treatment: F(1, 4)=36.89, p=0.0037] and DAN-*Daglb* KD [2way ANOVA, treatment:  
318 F(1, 4)=36.88, p=0.0037] trigenic mice compared to the vehicle treatment (**Fig. 6C**). However,  
319 the JZL184 treatment induced less robust enhancement of neural activity [2way ANOVA,  
320 genotype: F(1, 4)=14.58, p=0.0188] in the SNc of DAN-*Daglb* KD mice compared to the DAN-  
321 Ctrl mice (**Fig. 6C**).

322

323 To monitor dopamine release in the SN of DAN-Ctrl and DAN-*Daglb* KD mice, we  
324 stereotaxically injected AAV-DAm2 and AAV-tdT vectors in the dorsal striatum, and AAV-Ctrl  
325 or AAV-*Daglb* KD vectors in the SNc of DAT<sup>IRESCre</sup> mice (**Fig. 6D, E**). The same JZL184  
326 treatment also substantially enhanced dopamine release as indicated with the increased DA2m  
327 fluorescent signal intensities in the SN of both DAN-Ctrl [2way ANOVA, treatment: F(1,  
328 8)=23.13, p=0.0013] and DAN-*Daglb* KD [2way ANOVA, treatment: F(1, 6)=18.7, p=0.0049]

329 mice compared to the vehicle treatment. While the JZL184-induced dopamine release was not  
330 statistically significant between DAN-*Daglb* KD and DAN-Ctrl mice during the entire 60 min  
331 period [2way ANOVA, genotype:  $F(1, 7)=4.612$ ,  $p=0.0689$ ], multiple comparisons showed  
332 markedly less dopamine levels in the SN of DAN-*Daglb* KD mice after the drug treatment in 10,  
333 20, and 50 min (**Fig. 6F**). These data suggest a dynamic interplay between the dopamine and 2-  
334 AG signaling in the nigral DANs, in which the DAGLB-mediated 2-AG biosynthesis in nigral  
335 DANs promotes the DAN activity and somatodendritic dopamine release.

336

### 337 **Inhibition of 2-AG degradation rescues the motor impairments of *Daglb*-deficient mice**

338 Since the JZL184 treatment enhanced DAN activity and dopamine release in both the control and  
339 DAN-*Daglb* KD mice (**Fig. 6C, F**), and the activity of nigral DANs are essential for motor skill  
340 learning<sup>7,33</sup>, we then treated the mice with JZL184 or vehicle 1 hour before each day's rotarod  
341 motor training sessions. The JZL184 treatment (20 mg/kg) markedly improved the motor  
342 learning in both DAN-*Daglb* KD mice [2way ANOVA, treatment:  $F(1, 21)=59.9$ ,  $p<0.0001$ ] and  
343 DAN-Ctrl mice [2way ANOVA, treatment:  $F(1, 15)=18.3$ ,  $p<0.0001$ ] compared with the  
344 vehicle-treated ones (**Fig. 7**). Moreover, the administration of JZL184 completely rescued the  
345 motor learning deficits of DAN-*Daglb* KD mice and made those mice performed even better  
346 than the vehicle-treated DAN-Ctrl mice [2way ANOVA, genotype:  $F(1, 17)=6.645$ ,  $p=0.0196$ ]  
347 (**Fig. 7**). Therefore, the blockage of 2-AG degradation by JZL184 is sufficient to restore the local  
348 2-AG levels required for the rotarod motor skill learning in DAN-*Daglb* KD mice.

349

### 350 **Discussion**



351 In the present work we identified four novel PD-causal loss-of-function mutations in *DAGLB*  
352 and showed that DAGLB is the dominant 2-AG synthase in nigral DANs. In supporting the  
353 physiological importance of *DAGLB*-mediated 2-AG biosynthesis in nigral DAN-dependent  
354 motor functions, we found that genetic knockdown of *Daglb* in the mouse nigral DANs led to  
355 reduced nigral 2-AG levels and impaired rotarod motor skill learning, whereas pharmacological  
356 inhibition of 2-AG degradation increased nigral 2-AG levels, promoted DAN activity and  
357 dopamine release, and rescued the motor deficits. Therefore, we reveal a previously undescribed,  
358 DAN-specific pathophysiological mechanism of *DAGLB* dysfunction in PD pathogenesis and  
359 provide the rationale and additional preclinical evidence for the beneficial effects of eCB  
360 supplementation in PD treatment <sup>41</sup>.

361  
362 High levels of eCBs were detected in the cerebrospinal fluid of untreated PD patients <sup>42</sup>.  
363 Increased eCB levels in the globus pallidus are associated with reduced movement in a PD  
364 animal model<sup>43</sup>. However, previous studies in PD patients and related animal models mostly  
365 focused on the alterations of eCB signaling after severe nigral DAN loss or lengthy levodopa  
366 administration <sup>25</sup>. The results are thereby more likely to reflect the compensatory responses to the  
367 disease. It was unclear, however, whether the changes of eCB signaling contribute to the  
368 etiopathogenesis of the disease. Our human genetics study provides unequivocal genetic  
369 evidence and for the first time demonstrates that like dopamine deficiency, the impairment of 2-  
370 AG signaling also contributes to the pathogenesis of PD. *DAGLB* is a gene duplication of  
371 *DAGLA*<sup>23</sup>. Although DAGLA is the dominant 2-AG synthase in most neurons and accounts for  
372 80% of 2-AG production in the CNS <sup>21,22</sup>, our gene expression and functional assays demonstrate  
373 that DAGLB mediates the major 2-AG biosynthesis in nigral DANs. The predominant presence

374 of *DAGLB* in nigral DANs may explain why the loss-of-function mutations in *DAGLB* leads to  
375 DAN dysfunction and PD. On the other hand, the elevation of 2-AG levels in the other brain  
376 regions as observed in the PD patients <sup>42</sup> likely represents a compensatory response to the loss of  
377 *DAGLB*-mediated 2-AG production in the nigral DANs due to PD-related dopaminergic  
378 neurodegeneration.

379  
380 It might not be totally surprising that *Daglb*, *Parkin*, *Dj-1*, and *Pink1* germline KO mice all  
381 failed to develop any PD-like behavioral and pathological phenotypes. Longer lifespan and other  
382 genetic and physiological characteristics may render human neurons more susceptible to the  
383 disease-related mutations <sup>44</sup>. To overcome the futility in modeling the PD-related recessive  
384 mutations with germline KO mice, we applied CRISPR/saCas9-mediate knockdown of *Daglb*  
385 selectively in the nigral DANs of adult mice to avoid any potential compensatory interference  
386 during development. We also subjected the DAN-*Daglb* KD mice to the nigral DAN-dependent  
387 rotarod motor skill learning test to examine any DAN dysfunction. Finally, we employed fiber  
388 photometry live recording technique to monitor the 2-AG release in behaving mice in correlation  
389 with the motor performance. Together, we offer a new experimental scheme to study the  
390 pathophysiological mechanism of PD-related genetic mutations in mouse models, and reveal a  
391 new nigral DAN-specific pathogenic mechanism of *Daglb*-deficiency in PD. Since the overall  
392 efficiency of CRISPR/saCas9-mediated *Daglb* knockdown is about 70-80% in the current study,  
393 it is likely that the residual *DAGLB* activity in nigral DANs contributes to the increase of 2-AG  
394 levels during rotarod motor training and after JZL184 administration. A line of *Daglb*  
395 conditional KO mice that selectively delete *Daglb* in the adult nigral DANs would be useful to  
396 reveal potentially more severe behavioral and neurochemical phenotypes. In addition, *DAGLA*,

397 although a minor 2-AG synthase in nigral DANs, may also contribute to the residual 2-AG  
398 production in *Daglb*-deficient DANs. Genetic deletion of both *Dagla* and *Daglb* in nigral DANs  
399 may provide the means to critically evaluate the pathophysiological role of 2-AG in nigral DAN-  
400 dependent motor behaviors.

401  
402 DAGLA protein is enriched in dendritic spines <sup>21,22</sup>; however, the subcellular localization of  
403 DAGLB protein remains unclear due to a lack of specific antibodies for tissue staining.  
404 Considering that the CB1-positive axon fibers form close contact with the dendrites and cell  
405 bodies of ventral nigral DANs <sup>12</sup> and 2-AG acts within a short range (~10  $\mu\text{m}$ ) from the release  
406 sites <sup>29,30</sup>, it is reasonable to assume that DAGLB is distributed in the soma and dendrites of  
407 DANs for local 2-AG production and release. The strenuous rotarod training paradigm appears to  
408 promote the somatodendritic release of 2-AG from the nigral DANs more pronouncedly during  
409 the early phase of motor learning. The elevated 2-AG likely acts on the presynaptic CB1  
410 receptors to suppress the release of the inhibitory neurotransmitter GABA from the dSPN axon  
411 terminals <sup>19</sup>, resulting in enhanced DAN firing and dopamine release critical for the motor  
412 performance and learning process. By contrast, the suppression of *Daglb* expression in nigral  
413 DANs dampened the dynamic enhancement of 2-AG release especially during the acquisition of  
414 motor skills and compromised the motor performance. Consistently, a previous study also  
415 demonstrated that the administration of eCB agonist  $\Delta^9$ -tetrahydrocannabinol increases the DAN  
416 firing rate, dopamine synthesis, and dopamine release in dopaminergic axon terminals in striatum  
417 <sup>45</sup>, while the CB1 receptor agonist WIN55,212-2 induces dose-dependent increases in firing rate  
418 and burst firing in nigral DANs <sup>46</sup>. On the other hand, genetic deletion of CB1 receptors in  
419 dSPNs completely abolished the expression of CB1 receptors in SNr and induced similar motor

420 learning impairments as the DAN-*Daglb* KD mice. Therefore, the *DAGLB*-mediated 2-AG  
421 production in nigral DANs may enhance the nigral DAN activity and somatodendritic dopamine  
422 release and facilitate the motor learning and control through attenuating the inhibitory inputs  
423 from dSPNs. Since 2-AG works locally near the production and release sites, we only examined  
424 the interplay between 2-AG and dopamine signaling in the SN regions. Future experiments will  
425 be needed to investigate whether the change of 2-AG release in the soma and dendrites of nigral  
426 DANs affects the dopamine release in DAN axon terminals at dorsal striatum.

427  
428 Although the rotarod motor training paradigm promotes the on-demand 2-AG production by  
429 *DAGLB*, how the *DAGLB* activity is regulated remains to be determined. Striosome dSPN  
430 axons are intermingled with the dendrites of aldehyde dehydrogenase 1a1 (*ALDH1A1*)-positive  
431 DANs perpendicularly protruding in the SNr and form this so-called striosome-dendron bouquet  
432 structures<sup>10,11,13</sup>. The *ALDH1A1*-positive nigral DANs display distinct rebound activity in  
433 response to the inhibitory inputs from dSPNs<sup>10,11</sup>, which then trigger large dendritic Ca<sup>2+</sup>  
434 transients likely through T-type Ca<sup>2+</sup> channels<sup>11,47</sup>. Future studies will be needed to selectively  
435 knockout *Daglb* in the *ALDH1A1*-positive DANs and evaluate whether the intracellular Ca<sup>2+</sup>  
436 elevation in dendrites is required to induce on-site 2-AG production and release, which in turn  
437 retrogradely suppress the GABAergic inhibition from dSPNs and further accelerate the rebound  
438 activity of nigral DANs. Besides the transsynaptic action, 2-AG can also function cell-  
439 autonomously within the DANs through promoting both the pace-maker activity and evoked  
440 burst firing<sup>48</sup>, suggesting that *DAGLB*-deficiency in nigral DANs could also lead to reduced  
441 DAN activity and associated motor impairments. Therefore, the nigral DANs can produce and

442 release both dopamine and 2-AG, while 2-AG may further boost the dopamine release and neural  
443 activity in response to increasing demand.

444

445 The present study focused on the neuronal function of 2-AG; however, 2-AG is also implicated  
446 in inflammation<sup>49</sup>. Myeloid synthesis of 2-AG appears to promote vascular inflammation and  
447 atherogenesis<sup>50</sup>. *Daglb* inactivation in mouse peritoneal macrophages attenuates

448 lipopolysaccharide-induced release of proinflammatory cytokine tumor necrosis factor- $\alpha$ <sup>51</sup>.

449 Since the inhibition of DAGLB activity works against inflammatory responses<sup>51</sup>, we reason that  
450 the *DAGLB*-deficiency is less likely to directly induce the harmful neuroinflammation implicated  
451 in the pathogenesis of PD. Nonetheless, future study will be needed to further elucidate the role  
452 of *DAGLB* in microglia or other non-neuronal cells in PD.

453

454 In conclusion, our study supports a critical involvement of *DAGLB*-mediated 2-AG biosynthesis  
455 in regulating the normal physiological function of nigral DANs, which may help to explain how  
456 *DAGLB*-deficiency contributes to PD-related motor symptoms. To boost the production of 2-AG  
457 may thereby serve as a potential mechanistic-based therapeutic intervention in PD treatment.

458 Indeed, an exploratory clinical trial of eCB-like cannabidiol seems to improve the mobility and  
459 mental states of PD patients<sup>41</sup>.

460

## 461 **Materials and Methods**

### 462 **Study participants**

463 Participants were recruited at Xiangya Hospital, Central South University between October 2006  
464 and January 2019 and other hospitals of Parkinson's Disease and Movement Disorders

465 Multicenter Database and Collaborative Network in China (PD-MDCNC, <http://pd->  
466 [mdcnc.com:3111/](http://mdcnc.com:3111/)) established by our group. These participants include 156 cases with ARPD,  
467 1,498 cases of sporadic EOPD, and 1,758 matched healthy control subjects<sup>26</sup>. All individuals  
468 were subjected to the standard clinical neurological examination. PD was diagnosed according to  
469 the UK Parkinson's disease Society Brain Bank clinical diagnostic criteria<sup>52</sup> or Movement  
470 Disorders Society (MDS) clinical diagnostic criteria for Parkinson's disease<sup>53</sup> by at least two  
471 neurologists. The healthy subjects did not have any nervous system or psychiatric diseases.  
472 Human blood samples and fibroblasts were obtained after subjects provided written informed  
473 consent. All investigations were conducted according to the Declaration of Helsinki, and the  
474 study was approved by the Institutional Review Boards of the Ethics Committee of Xiangya  
475 Hospital, Central South University.

476

#### 477 **PET Study**

478 According to a previously reported method<sup>54</sup>, positron emission tomography/computed  
479 tomography (PET/CT) was performed on the Family 2 II-4 using <sup>11</sup>C-2 $\beta$ -carbomethoxy-3 $\beta$ -(4-  
480 fluorophenyl) tropane (<sup>11</sup>C-CFT) tracer. Before the PET/CT imaging, the patient discontinued  
481 the drug intake for 2 days to avoid the potential effect of anti-PD drugs. Brain PET imaging was  
482 performed at one hour after intravenous injection of <sup>11</sup>C-CFT. The regions of interest in each  
483 hemisphere were identified and drawn on the caudate nucleus, putamen, and cerebellum.

484

#### 485 **SNP genotyping and homozygosity mapping**

486 DNA samples of Family 1 (AR-003), Family 2 (AR-005) and Family 4 underwent genome-wide  
487 SNP array genotyping. Genome-wide genotyping was performed with the Illumina Human Omni

488 ZhongHua-8 Bead Chip arrays. Homozygosity mapping was performed with PLINK  
489 (<http://pngu.mgh.harvard.edu/purcell/plink/>) for the identification of regions of homozygosity in  
490 affected individuals, and the minimum length for homozygous runs was set to 2 Mb.

#### 491 **Whole exome sequencing**

492 Exome data were obtained from the 156 cases with ARPD, 1,498 cases of sporadic EOPD, and  
493 1258 matched control subjects. As previous reported <sup>26</sup>, whole-exome DNA was capture using  
494 the SureSelect Human All Exon Kit V5 or V6 (Agilent) and high-throughput sequencing was  
495 conducted using the Illumina X10 with a coverage more than 100 X. Burrow-Wheeler Aligner  
496 was implemented to align Paired-end sequence reads onto the reference human genome (UCSC  
497 hg19). The Picard tool (<http://broadinstitute.github.io/picard/>) was used to remove duplicate  
498 reads, generate the converse format, and index the sequencing data. Base quality-score  
499 recalibration, local realignments around possible insertions/deletions (indels), variant calling, and  
500 filtering were performed with the Genome Analysis Toolkit (GATK) <sup>55</sup>. ANNOVAR <sup>56,57</sup> was  
501 used to annotate single nucleotide variants and insertions/deletions with RefSeq (UCSC hg19),  
502 such as gene regions, amino acid alterations, functional effects, and allele frequencies in East  
503 Asian population from GnomAD database and ExAC database. Mutations of previously reported  
504 PD causative genes were excluded. The minor allele frequency of the variants was limited to  
505 0.01 for the above population database. Only predicted damaging missense and loss-of-function  
506 variants (nonsense variants, frameshift indels, and splicing-site variants) were included.

507

#### 508 **Sanger sequencing**

509 Potential mutations were confirmed by Sanger sequencing and were shown to segregate with the  
510 phenotype. Mutation analysis of *DAGLB* in another 500 matched control cohort was done by

511 direct sequencing (GenBank, NM\_139179.4 and NP\_631918.3). Genomic DNAs from  
512 individuals were amplified by PCR with oligonucleotide primers complementary to flanking  
513 intronic sequences. Samples were run and analyzed on an ABI PRISM 3130 genetic analyzer  
514 (Applied Biosystems).

515

### 516 **Detection and validation of CNVs in *DAGLB***

517 The detection of copy-number variant (CNV) in *DAGLB* from WES data in our ARPD and  
518 sporadic EOPD cohorts was performed with the eXome-Hidden Markov Model (XHMM)  
519 software, which uses principal component analysis normalization and a hidden Markov model to  
520 detect and genotype CNVs from normalized read-depth data from targeted sequencing  
521 experiments. To further analyze the detailed structure variants of *DAGLB* in our patients  
522 identified by the WES CNV analysis, we used the Oxford Nanopore platform to sequence the  
523 same individuals (Family 3, AR-075). As previous reported<sup>58,59</sup>, large insert-size libraries were  
524 created according to the manufacturer recommended protocols (Oxford Nanopore). Libraries  
525 were sequenced on R9.4.1 flow cells using PromethION. NGMLR and Sniffles were used to  
526 analyze structural variations. All reads were aligned to the human reference genome (hg19) using  
527 NGMLR (ngmlr 0.2.7), and structural variation calls were detected by Sniffles. Candidate  
528 structural variations were subjected to manual examination and further validation. Sanger  
529 sequencing of the PCR product of the breakpoints was performed using standard protocols.

530

### 531 **Human skin fibroblast culture**

532 Human dermal fibroblasts were derived from skin biopsies from affected individuals and age-  
533 and sex-matched non-neurological controls, through standard techniques<sup>60</sup>. Fibroblasts were



534 cultured in Dulbecco's modified Eagle's medium (ThermoFisher) supplemented with 10% fetal  
535 bovine serum, penicillin, and streptomycin (Gibco). Cells were grown in 5% CO<sub>2</sub> at 37 °C in a  
536 humidified incubator. To further investigate the protein stability of DAGLB in human dermal  
537 fibroblasts, cells were treated with proteasome inhibitor MG132 (Sigma, M7449) at 10 μM for  
538 24 hours before the cells were collected. DMSO was used as a control vehicle.

539

#### 540 **Quantitative RT-PCR (qRT-PCR)**

541 Total RNA was extracted with RNeasy kit (QIAGEN), and first-strand cDNA synthesis was  
542 performed with a SuperScript III First-Strand Synthesis system (Invitrogen). Real-time Taqman  
543 PCR was performed on an ABI 7900HT with TaqMan Gene Expression Assays (Applied  
544 Biosystems, Life Technologies, Carlsbad, CA) for human *DAGLB* exon 9-10 (Hs00373700\_m1).  
545 Results were normalized to GAPDH. Experiments were performed with triplicate experimental  
546 samples and controls, and fold increases were calculated using the comparative threshold cycle  
547 method.

548

#### 549 **Western blotting**

550 Cells were lysed in radioimmunoprecipitation assay (RIPA) buffer containing protease and  
551 phosphatase inhibitor cocktails and sonicated for 1 min with the Bioruptor sonication device  
552 (Diagenode). Cell lysates were centrifuged at 13,000 × g for 10 min at 4 °C, and the supernatant  
553 was collected for protein quantification (Pierce BCA Protein Assay Kit). Each sample contained  
554 20 μg of proteins and was mixed with Bolt LDS Sample Buffer and Sample Reducing Agent  
555 (ThermoFisher) and heated at 70 °C for 10 min. The prepared protein extracts were size  
556 fractionated by 4 to 12% NuPAGE Bis-Tris gel electrophoresis (Invitrogen) using MES running

557 buffer (Invitrogen). After transfer to the nitrocellulose membranes using Transfer Cell (Bio-  
558 Rad), the membranes were blocked with Odyssey Blocking Buffer (LI-COR) and probed  
559 overnight with the appropriate dilutions of the primary antibodies. The antibodies used for  
560 western blot analysis included Rabbit monoclonal anti-DAGLB (Cell Signaling, 12574S, 1:500),  
561 Rabbit polyclonal anti-DAGLA (Frontier Institute co. ltd, DGLa-Rb-Af380, 1:250), Rabbit  
562 monoclonal anti-HA-Tag (Cell Signaling, 3724S, 1:500), Rabbit monoclonal anti-Cre  
563 Recombinase (Cell Signaling, 12830S, 1:500), Mouse monoclonal anti-GAPDH (Sigma-Aldrich,  
564 G8795, 1:5000) and Mouse monoclonal anti- $\beta$ -actin (Sigma-Aldrich, A2228, 1:5000). Incubation  
565 with the IRDye-labeled secondary antibodies (LI-COR, 1:10000) was performed for 1 hour at  
566 room temperature. The protein bands of interest were visualized with Odyssey CLx Infrared  
567 Imaging Studio. The band intensity was quantified using ImageJ.

#### 568 **Mouse work** 569

570 All mouse studies were in accordance with the guidelines approved by Institutional Animal Care  
571 and Use Committees (IACUC) of the National Institute on Aging (NIA), NIH. The wild-type  
572 C57BL/6J (#000664), DAT<sup>IRESCre</sup> (#006660), Ai95 (RCL-GCaMP6f) (#028865), and Ai9 (RCL-  
573 tdT) (#007909) mice were purchased from the Jackson laboratory. *Cnr1*<sup>loxP/loxP</sup> mice<sup>38</sup> were  
574 generously provided by Dr. Josephine M. Egan of NIA. Mice were housed in a twelve-hour-  
575 light/twelve-hour-dark cycle and were fed water and regular diet ad libitum. All the behavioral  
576 tasks were performed during the light cycles. The genotype, gender and age of mice were  
577 indicated in the figure legends.

#### 578 **RNA *in situ* hybridization with RNAscope.** 579 580

581 RNAscope (Advanced Cell Diagnostics, ACD) was performed according to the manufacturer's  
582 instructions on fresh frozen tissue sections. The sample preparation and pretreatment were  
583 conducted according to the instructions of RNAscope Multiplex Fluorescent Reagent Kit v2 user  
584 manual. RNAscope probes for *Daglb* (Cat No. 497801-C1) and *Th* (Cat No. 317621-C2) were  
585 purchased from ACD and used according to the company's online protocols. Fluorescent images  
586 were acquired using a laser scanning confocal microscope LSM 780 (Zeiss).

587

### 588 **RNA-sequencing**

589 For the RNA sequencing of nigrostriatal DANs, we used LCM to isolate GFP-positive DANs in  
590 the SNc region of *Pitx3<sup>+/IRES2-tTA</sup>* (JAX#021962)/pTRE-H2BGFP (JAX#005104) double  
591 transgenic mice as described previously<sup>61</sup>. The animals were anesthetized with CO<sub>2</sub> followed by  
592 decapitation at one year old. The brains were rapidly dissected and frozen in dry ice. The frozen  
593 brains were sectioned at 30µm thickness by a cryostat onto a PAN membrane frame slide  
594 (Applied Biosystems, Foster City, CA) and stored at -80°C until LCM performance. By an  
595 ArturusXT micro-dissection system with fluorescent illumination (Applied Biosystems), the  
596 GFP-positive cells in the SNc region were selected and then captured onto LCM Macro Caps  
597 (Applied Biosystems) at the following working parameters: spot size, 7-25µm; power, 50 –  
598 70mW; duration, 20-40µs. The total RNA was extracted and purified with the PicoPure Isolation  
599 kit (Applied Biosystems) and genomic DNA was cleaned-up by RNase free DNase (Qiagen)  
600 after the protocols provided by the manufacturers. The RNA was quantified using a NanoDrop  
601 spectrophotometer (ThermoFisher) and the RNA integrity was measured using the Bioanalyzer  
602 RNA 6000 pico assay (Agilent). The cDNA libraries were generated from the purified RNA  
603 using TruSeq Stranded Total RNA LT library preparation kit (Illumina) according to the

604 manufacturer's instructions. The libraries were then qualified using the Bioanalyzer DNA 1000  
605 assay (Agilent) and sequenced with Illumina HiSeq 2000. The standard Illumina pipeline was  
606 used to generate Fastq files. The Ensembl annotated transcript abundance was quantified using  
607 Salmon in a non-alignment-based mode, and gene level counts were estimated using Tximport  
608 package (Bioconductor). The counts for the resulting genes were then normalized using a  
609 variance-stabilizing transformation. For the RNA sequencing of striatal tissues, the dorsal striatal  
610 of 3-month-old C57BL/6J mice were dissected and subjected to RNA extraction, sequencing and  
611 data analysis as described recently <sup>62</sup>.

### 612 **AAV-*Daglb* KD gene targeting vector construction, validation, and packaging**

614 *Vector construction*—All plasmids were constructed using standard recombinant DNA cloning  
615 techniques. The PX601-AAV-CMV::NLS-SaCas9-NLS-3xHA-bGHpA;U6::BsaI-sgRNA  
616 plasmid was a gift from Feng Zhang (Addgene plasmid # 61591) <sup>28</sup>. The *Daglb* sgRNA oligos  
617 were designed with Benchling (<https://benchling.com>) and subcloned into the PX601-AAV-  
618 CMV::NLS-SaCas9-NLS-3xHA-bGHpA;U6::BsaI-sgRNA vector. To construct a single AAV  
619 vector harboring both Cre-dependent SaCas9 transgene and constitutively expressed sgRNA  
620 expression cassette, the Magneto2.0-sNRPPa element of pAAV-CMV-DIO-Magneto2.0-  
621 sNRPPa expression vector, a gift from Ali Guler (Addgene plasmid # 74307)<sup>63</sup>, was replaced by  
622 the SaCas9-NLS-3xHA-bGHpA;U6::BsaI-sgRNA DNA fragment.

623 *Vector validation*—Neuro-2a (N2a) cell lines were maintained in Dulbecco's modified Eagle's  
624 medium (DMEM) supplemented with 10% FBS (HyClone), 2mM GlutaMAX (Life  
625 Technologies), 100U/ml penicillin, and 100 mg streptomycin at 37°C with 5% CO<sub>2</sub> incubation.  
626 Cells were co-transfected with pAAV-Cre-GFP and pAAV-CMV-DIO-SaCas9-NLS-3xHA-  
627 bGHpA;U6::BsaI-sgRNA plasmids or pAAV-EF1a-DIO-mCherry plasmids (Addgene plasmid

628 #50462) at the ratio of 1:3 using X-tremeGENE HP DNA Transfection Reagent (Roche)  
629 following the manufacturer's recommended protocol. Cells were harvested for PCR-based  
630 identification of mutations caused by genome editing using the Guide-it Mutation Detection Kit  
631 (Cat. No. 631443), and immunoblotting were performed to analyze the DAGLB protein levels.  
632 *AAV packaging*—The packaging was carried out by a commercial source (Vigene Biosciences  
633 Inc.) and the resulting AAVs had titers of  $1.0 \times 10^{13}$  to  $2.0 \times 10^{14}$  genome copies per ml.  
634 *Stereotactic injection*—The stereotactic survival surgery was performed as previously described<sup>7</sup>.  
635 500 nL of AAVs with titers  $8.0 \times 10^{13}$  genome copies per ml were loaded into 2  $\mu$ L Neuros  
636 Syringes (Hamilton) and were injected into brain areas at chosen coordinates. The coordinates  
637 based on Bregma coordinate for SNc are AP -3.1 mm, ML:  $\pm$  1.5 mm, DV -3.9 mm.

638

### 639 **Primary neuronal culture and viral infection**

640 Mouse primary neuronal cultures were prepared from the cortices of embryonic day 16.5  
641 embryos. Briefly, cortices were dissected in cold Hank's balanced salt solution, and incubated  
642 with 0.025% trypsin for 20 min at 37°C. The digested tissue was triturated into single cells using  
643 glass Pasteur pipettes and filtering through 70  $\mu$ m nylon cell strainer. The cells were seeded in  
644 plated in Biocoat Poly-D-Lysine Cellware plate and maintained in neurobasal medium  
645 supplemented with 2% B27 and 2 mM GlutaMax at 37°C in 5% CO<sub>2</sub> humidified incubator. Cells  
646 at 4 days in vitro (DIV) were infected with AAV DJ-Cre-GFP and AAV DJ-CMV-DIO-SaCas9-  
647 NLS-3xHA-bGHpA;U6::BsaI-sgRNA at the ratio of 1:3, and the cells were harvested 7 days  
648 after infection for western blot analyses.

649

### 650 **Behavioral tests**

651 *Rotarod motor skill learning test*—Mice were placed onto a rotating rod with auto acceleration  
652 from 4 to 40 rpm in 5 min (Panlab). The duration that each mouse was able to stay on the  
653 rotating rod in each trial was recorded as the latency to fall. The standard motor learning task  
654 was performed as ten trials per day for six consecutive days as described previously <sup>7</sup>.

655 *Open-field test*—The ambulatory, rearing and fine movements of mice were measured with the  
656 Flex-Field activity system (San Diego Instruments). Flex-Field software was used to trace and  
657 quantify mouse movement in the unit as the number of beam breaks per 30 min as previously  
658 described <sup>64</sup>.

659 *Gait analysis*—The Free Walk Scan system (CleverSys Inc) was used for gait analysis as  
660 described before <sup>7</sup>. Briefly, mice were allowed to move freely in a 40 cm × 40 cm × 30 cm  
661 (length × width × height) chamber. A high-speed camera below a clear bottom plate was used to  
662 capture mouse movement for 5 min in the red light. Videos were analyzed using  
663 FreewalkScanTM2.0 software (CleverSys Inc) for various characteristic parameters of gait  
664 including stride length and stance/swing time of each paw.

665

### 666 **Histology, immunohistochemistry, and light microscopy**

667 Mice were anesthetized with ketamine and then transcardially perfused with 4% PFA/PBS  
668 solution. Brains were isolated, post-fixed in 4% PFA overnight, and then submerged in 30%  
669 sucrose for 72 hour at 4 °C for later sectioning. Series of 40 µm sections were collected using a  
670 cryostat (Leica Biosystems). Sections were blocked in 10% normal donkey serum, 1% bovine  
671 serum albumin, 0.3% Triton X-100, and PBS solution for overnight at 4 °C. The sections were  
672 then incubated with the primary antibodies over one to two nights at 4 °C. The antibodies used  
673 for immunostaining included rat monoclonal anti-DRD1 (Sigma-Aldrich, D2944, 1:500), mouse

674 monoclonal anti-CB1 (Synaptic systems, 258011, 1:500), rabbit monoclonal anti-TH (Pel-Freez  
675 Biologicals, P40101, 1:2500), mouse monoclonal anti-TH (ImmunoStar, 22941, 1:1000),  
676 chicken polyclonal anti-TH (Aves Labs, TYH, 1:500), chicken polyclonal anti-GFP (Aves Labs,  
677 GFP-1020, 1:1000), rabbit polyclonal anti-RFP (Rockland, 600-401-379, 1:1000), rabbit  
678 monoclonal anti-HA-Tag (Cell Signaling, 3724S, 1:100) and guinea pig polyclonal anti-NeuN  
679 (Synaptic systems, 266 004, 1:1000). Sections were then washed three times in PBS before being  
680 incubated in the secondary antibody solutions with Alexa Fluor 488, 546, or 633-conjugated  
681 secondary antibodies (1:500, Invitrogen) at 4 °C for overnight. Following three washes in PBS,  
682 sections were mounted onto subbed slides, and coverslipped with mounting media (ProLong®  
683 Gold Antifade Mountant, Life technology). The stained sections were imaged using a laser  
684 scanning confocal microscope (LSM 780, Zeiss). The paired images in the figures were collected  
685 at the same gain and offset settings.

686

## 687 **Stereology**

688 According to the mouse brain in stereotaxic coordinates, a series of coronal sections across the  
689 midbrain (40 µm per section, every fourth section from Bregma – 2.54 to – 4.24 mm, ten  
690 sections per case) were processed for TH immunohistochemistry and finally visualized using a  
691 laser scanning confocal microscope (LSM 780, Zeiss). The images were captured as a single  
692 optic layer under 20 × objective lens. TH-positive neurons in SNc were assessed using the  
693 fractionator function of Stereo Investigator 10 (MBF Bioscience) as described previously<sup>61</sup>. Five  
694 mice were used per group. Counters were blinded to the genotypes of the samples.

695

## 696 **2-AG measurement with liquid chromatography-tandem mass spectrometry**

697 Endocannabinoids were extracted from the SNc of 3 to 4-month-old mice and quantified by LC-  
698 MS/MS as previously described<sup>65</sup>. In brief, the fresh brain tissues were sliced at 500  $\mu$ m  
699 thickness and frozen immediately in liquid nitrogen. The samples were taken by punch technique  
700 then kept on dry ice or at -80°C. Tissue samples from individual mice were homogenized in 80-  
701 300  $\mu$ l of Tris buffer (pH 8.0) and the protein concentrations were determined by Bradford assay.  
702 Ice-cold of methanol/Tris buffer (50 mM, pH 8.0) solution was added to each homogenate (1:1,  
703 vol/vol). 200 ng [<sup>2</sup>H<sub>5</sub>] of arachidonoyl glycerol ([<sup>2</sup>H<sub>5</sub>]2-AG) were used as internal standard. The  
704 homogenates were extracted three times with CHCl<sub>3</sub>: methanol (2:1, vol/vol), dried under  
705 nitrogen and reconstituted with methanol after precipitating proteins with ice-cold acetone. The  
706 dried samples were reconstituted in 50  $\mu$ l of ice-cold methanol, and 2  $\mu$ l of which were analyzed  
707 with liquid chromatography in line mass spectrometry. The LC-MS/MS analyses were conducted  
708 on an Agilent 6410 triple quadrupole mass spectrometer (Agilent Technologies) coupled to an  
709 Agilent 1200 LC system. Analytes were separated using a Zorbax SB-C18 rapid-resolution HT  
710 column. Gradient elution mobile phases consisted of 0.1% formic acid in water (phase A) and  
711 0.1% formic acid in methanol (phase B). Gradient elution (250 mL/min) was initiated and held at  
712 10% B for 0.5 min, followed by a linear increase to 85% B at 1 min and maintained until 12.5  
713 min, then increased linearly to 100% B at 13 min and maintained until 14.5 min. The mass  
714 spectrometer was set for electrospray ionization operated in positive ion mode. The source  
715 parameters were as follows: capillary voltage, 4,000 V; gas temperature, 350°C drying gas, 10  
716 L/min; nitrogen was used as the nebulizing gas. Collision-induced dissociation was performed  
717 using nitrogen. Level of each compound was analyzed by multiple reactions monitoring. The  
718 molecular ion and fragment for each compound were measured as follows: m/z 348.3/91.1 for  
719 [<sup>2</sup>H<sub>5</sub>]2-AG and m/z 379.3/91.1 for 2-AG. Analytes were quantified by using Mass-Hunter



720 Workstation LC/QQQ Acquisition and MassHunter Workstation Quantitative Analysis software  
721 (Agilent Technologies). Levels of AEA and 2-AG in the samples were measured against  
722 standard curves.

723

#### 724 ***In vivo* fiber photometry**

725 A custom-built dual color fiber photometry system<sup>31</sup> was used for *in vivo* measurement of  
726 eCB2.0, DA2m, GCaMP6f, and tdTomato fluorescent signals. For imaging the eCB2.0 or DA2m  
727 signals, 600 nl AAV9-hsyn-eCB2.0 ( $2.3 \times 10^{12}$  GC/ml, Vigene Biosciences) or AAV9-hsyn-  
728 DA2m ( $4.67 \times 10^{11}$  GC/ml, Vigene Biosciences) AAVs were mixed with 200 nl AAV9-hsyn-  
729 tdTomato ( $1.38 \times 10^{12}$  GC/ml, Vigene Biosciences) AAVs and stereotactically injected in the  
730 dorsal striatum (coordinates: AP+0.5mm, ML+2.4mm, DV -2.5mm; AP+1.5mm, ML+1.8mm,  
731 DV-3.0mm) of 3 to 4-month-old wild-type C57BL/6J (JAX#000644) or DAT<sup>IRESc<sup>re</sup></sup>  
732 (JAX#006660) mice. Four weeks after viral injection, an optical probe (200  $\mu$ m core and 0.22  
733 NA) was implanted with the tips sitting in the SNr areas (coordinates: AP-3.16 mm, ML+1.4  
734 mm, DV -4.4 mm) for imaging the eCB2.0 or DA2m signals. The animals were allowed to  
735 recover for at least one week after the fiber implantation surgery before the fiber photometry  
736 measurement. The fluorescence signals were acquired using 49 ms integration time and were  
737 triggered by 20 Hz transistor-transistor logic pulses from an output pulse generator. The eCB2.0,  
738 DA2m or GCaMP6f fluorescence signals were calculated by total photo counts between 500 nm  
739 and 540 nm. The tdTomato fluorescence signals were calculated by total photon counts between  
740 575 nm and 650 nm. The measured emission spectra of eCB2.0, DA2m, GCaMP6f and tdTomato  
741 signals were fitted using a linear unmixing algorithm  
742 (<https://www.niehs.nih.gov/research/atniehs/labs/ln/pi/iv/tools/index.cfm>). The coefficients of

743 eCB2.0, DA2m, GCaMP6f and tdTomato signals generated by the unmixing algorithm were used  
744 to represent the fluorescence intensities of eCB2.0, DA2m, GCaMP6f and tdTomato,  
745 respectively. To correct for movement-induced artifacts, the ratios of eCB2.0, DA2m or  
746 GCaMP6f signal intensities against the corresponding tdTomato signal intensities were used to  
747 represent the final normalized signal intensities.

748  
749 For the JZL184 experiments, fiber photometry recordings were conducted in free-moving  
750 animals for 20 min before drug administration to measure the baseline fluorescent intensities and  
751 then for 60 min or 120 min after drug treatment. The average baseline signals were calculated as  
752  $F_B$ . The instant signals at different time point after drug treatment were calculated as  $F_I$ . The  
753 alterations of signal intensities at different time points were calculated as  $\Delta F/F = (F_I - F_B)/F_B$ .

754  
755 The rotarod motor skill learning and fiber photometry recoding experiments were performed as  
756 reported previously<sup>34</sup>. Briefly, in each trial the mice were put on a rotatable rod (EZRod,  
757 Omnitech Electronics) starting at 4 rpm constant speed for 30 sec and then steadily accelerated  
758 from 4 to 40 rpm in 5min, while the fiber photometry recording was performed at the same time.  
759 10 trials and recordings were carried out each day for six continuous days.  $F_B$ , the baseline signal  
760 intensity of the first trial of each day, is the average signal intensities at 4 rpm for the first 30 sec.  
761  $F_I$  represents the average signal intensity during each trial. The alterations of signal intensities at  
762 different trials were calculated as  $\Delta F/F = (F_I - F_B)/F_B$ .

763

764 **Statistical analyses.**

765 All the data were analyzed by Prism 8 software (Graphpad). Data were presented as mean  $\pm$   
766 SEM or mean  $\pm$  SD. N represents animal numbers and is indicated in the figure legends.  
767 Statistical significance was determined by comparing means of different groups using *t* test or  
768 ANOVA followed by post hoc tests.

769

## 770 **Acknowledgements**

771 This work is supported in part by the National Key Plan for Scientific Research and  
772 Development of China grants (BT, Grant No. 2016YFC1306000), the National Natural Science  
773 Foundation of China (BT, Grant No. 81430023), and the Intramural Research Programs of  
774 National Institute on Aging, NIH (HC, ZIA AG000944, AG000928), National Institute of  
775 Alcoholism and Alcohol Abuse (DML, ZIA AA000416; AS, K99/R00 AA025991), and National  
776 Institute of Environmental Health Sciences (GC, ZIA ES103310). We thank NIMH rodent  
777 behavioral core for assisting in behavioral tests, Dr. Josephine M. Egan of NIA for providing the  
778 *Cnr1*<sup>loxP/loxP</sup> mice and members of Cai lab for their suggestions and technical assistance. Drs.  
779 Zhenhua Liu and Nannan Yang used to be participants in the NIH Graduate Partnership Program  
780 and graduate students at Central South University. Dr. Wotu Tian was a participant in the NIH  
781 Graduate Partnership Program and a graduate student at Shanghai Jiao Tong University School  
782 of Medicine. Dr. Jie Dong used to be a participant in the NIH Graduate Partnership Program and  
783 a graduate student at Dalian Medical University. We are indebted to the participation of the  
784 patients and their family members in this study.

785

## 786 **Author contributions**

787 B.T. designed and supervised the human genetics study. H.C. conceived, designed and  
788 supervised the mouse experiments. H.C. wrote the manuscript and prepared the figures with  
789 inputs from all authors. Z.L. performed human genetics study, biochemistry, histology and  
790 mouse behavioral experiments, and prepared figures and tables of genetics data. N.Y. performed  
791 fiber photometry experiments and data analyses. J.G., J.M., P.C., H.S. and T.W. contributed to  
792 human genetic study. J.T. and Z. Z. contributed to biochemistry study. W.T., S.C., S.H., J.K.,  
793 and J.W. contributed to behavior tests, histology, and data analyses. A.S., D.L., J.D., W.L., J.Z.  
794 and G.C. contributed to fiber photometry, histology, and data analyses. L.C. performed  
795 stereotactic surgery. L.S., C.X. and J.H.D. contributed to RNA-sequencing and data analyses.  
796 Y.L., A.D., and K.H. provided eCB2.0 and DA2m sensors. R.C. performed endocannabinoids  
797 measurements. All authors read and approved the final manuscript.

798

799 **Conflict of interest**

800 The authors declare no competing interests.

801

## 802 References

- 803 1 Poewe, W. *et al.* Parkinson disease. *Nat Rev Dis Primers* **3**, 17013,  
804 doi:10.1038/nrdp.2017.13 (2017).
- 805 2 Cai, H., Liu, G., Sun, L. & Ding, J. Aldehyde Dehydrogenase 1 making molecular  
806 inroads into the differential vulnerability of nigrostriatal dopaminergic neuron subtypes in  
807 Parkinson's disease. *Transl Neurodegener* **3**, 27, doi:10.1186/2047-9158-3-27 (2014).
- 808 3 Surmeier, D. J., Obeso, J. A. & Halliday, G. M. Selective neuronal vulnerability in  
809 Parkinson disease. *Nat Rev Neurosci* **18**, 101-113, doi:10.1038/nrn.2016.178 (2017).
- 810 4 Hernandez, D. G., Reed, X. & Singleton, A. B. Genetics in Parkinson disease: Mendelian  
811 versus non-Mendelian inheritance. *J Neurochem* **139 Suppl 1**, 59-74,  
812 doi:10.1111/jnc.13593 (2016).
- 813 5 Blauwendraat, C., Nalls, M. A. & Singleton, A. B. The genetic architecture of  
814 Parkinson's disease. *Lancet Neurol* **19**, 170-178, doi:10.1016/S1474-4422(19)30287-X  
815 (2020).
- 816 6 Dudman, J. T. & Krakauer, J. W. The basal ganglia: from motor commands to the control  
817 of vigor. *Curr Opin Neurobiol* **37**, 158-166, doi:10.1016/j.conb.2016.02.005 (2016).
- 818 7 Wu, J. *et al.* Distinct Connectivity and Functionality of Aldehyde Dehydrogenase 1a1-  
819 Positive Nigrostriatal Dopaminergic Neurons in Motor Learning. *Cell Rep* **28**, 1167-1181  
820 e1167, doi:10.1016/j.celrep.2019.06.095 (2019).
- 821 8 Watabe-Uchida, M., Zhu, L., Ogawa, S. K., Vamanrao, A. & Uchida, N. Whole-brain  
822 mapping of direct inputs to midbrain dopamine neurons. *Neuron* **74**, 858-873,  
823 doi:10.1016/j.neuron.2012.03.017 (2012).
- 824 9 McGregor, M. M. *et al.* Functionally Distinct Connectivity of Developmentally Targeted  
825 Striosome Neurons. *Cell Rep* **29**, 1419-1428 e1415, doi:10.1016/j.celrep.2019.09.076  
826 (2019).
- 827 10 Evans, R. C. *et al.* Functional Dissection of Basal Ganglia Inhibitory Inputs onto  
828 Substantia Nigra Dopaminergic Neurons. *Cell Rep* **32**, 108156,  
829 doi:10.1016/j.celrep.2020.108156 (2020).
- 830 11 Carmichael, K. *et al.* Function and Regulation of ALDH1A1-Positive Nigrostriatal  
831 Dopaminergic Neurons in Motor Control and Parkinson's Disease. *Front Neural Circuits*  
832 **15**, 644776, doi:10.3389/fncir.2021.644776 (2021).
- 833 12 Davis, M. I. *et al.* The cannabinoid-1 receptor is abundantly expressed in striatal  
834 striosomes and striosome-dendron bouquets of the substantia nigra. *PLoS One* **13**,  
835 e0191436, doi:10.1371/journal.pone.0191436 (2018).
- 836 13 Crittenden, J. R. *et al.* Striosome-dendron bouquets highlight a unique striatonigral circuit  
837 targeting dopamine-containing neurons. *Proc Natl Acad Sci U S A* **113**, 11318-11323,  
838 doi:10.1073/pnas.1613337113 (2016).
- 839 14 Pacher, P., Batkai, S. & Kunos, G. The endocannabinoid system as an emerging target of  
840 pharmacotherapy. *Pharmacol Rev* **58**, 389-462, doi:10.1124/pr.58.3.2 (2006).
- 841 15 Wilson, R. I. & Nicoll, R. A. Endocannabinoid signaling in the brain. *Science* **296**, 678-  
842 682, doi:10.1126/science.1063545 (2002).
- 843 16 Morena, M., Patel, S., Bains, J. S. & Hill, M. N. Neurobiological Interactions Between  
844 Stress and the Endocannabinoid System. *Neuropsychopharmacology* **41**, 80-102,  
845 doi:10.1038/npp.2015.166 (2016).

- 846 17 Lovinger, D. M. & Mathur, B. N. Endocannabinoids in striatal plasticity. *Parkinsonism*  
847 *Relat Disord* **18 Suppl 1**, S132-134, doi:10.1016/S1353-8020(11)70041-4 (2012).
- 848 18 Kano, M., Ohno-Shosaku, T., Hashimoto, Y., Uchigashima, M. & Watanabe, M.  
849 Endocannabinoid-mediated control of synaptic transmission. *Physiol Rev* **89**, 309-380,  
850 doi:10.1152/physrev.00019.2008 (2009).
- 851 19 Matyas, F. *et al.* Identification of the sites of 2-arachidonoylglycerol synthesis and action  
852 imply retrograde endocannabinoid signaling at both GABAergic and glutamatergic  
853 synapses in the ventral tegmental area. *Neuropharmacology* **54**, 95-107,  
854 doi:10.1016/j.neuropharm.2007.05.028 (2008).
- 855 20 Bisogno, T. *et al.* Cloning of the first sn1-DAG lipases points to the spatial and temporal  
856 regulation of endocannabinoid signaling in the brain. *J Cell Biol* **163**, 463-468,  
857 doi:10.1083/jcb.200305129 (2003).
- 858 21 Gao, Y. *et al.* Loss of retrograde endocannabinoid signaling and reduced adult  
859 neurogenesis in diacylglycerol lipase knock-out mice. *J Neurosci* **30**, 2017-2024,  
860 doi:10.1523/JNEUROSCI.5693-09.2010 (2010).
- 861 22 Tanimura, A. *et al.* The endocannabinoid 2-arachidonoylglycerol produced by  
862 diacylglycerol lipase alpha mediates retrograde suppression of synaptic transmission.  
863 *Neuron* **65**, 320-327, doi:10.1016/j.neuron.2010.01.021 (2010).
- 864 23 Reisenberg, M., Singh, P. K., Williams, G. & Doherty, P. The diacylglycerol lipases:  
865 structure, regulation and roles in and beyond endocannabinoid signalling. *Philos Trans R*  
866 *Soc Lond B Biol Sci* **367**, 3264-3275, doi:10.1098/rstb.2011.0387 (2012).
- 867 24 Pisani, V. *et al.* Homeostatic changes of the endocannabinoid system in Parkinson's  
868 disease. *Mov Disord* **26**, 216-222, doi:10.1002/mds.23457 (2011).
- 869 25 Cristino, L., Bisogno, T. & Di Marzo, V. Cannabinoids and the expanded  
870 endocannabinoid system in neurological disorders. *Nat Rev Neurol* **16**, 9-29,  
871 doi:10.1038/s41582-019-0284-z (2020).
- 872 26 Zhao, Y. *et al.* The role of genetics in Parkinson's disease: a large cohort study in Chinese  
873 mainland population. *Brain* **143**, 2220-2234, doi:10.1093/brain/awaa167 (2020).
- 874 27 Nichterwitz, S. *et al.* Laser capture microscopy coupled with Smart-seq2 for precise  
875 spatial transcriptomic profiling. *Nat Commun* **7**, 12139, doi:10.1038/ncomms12139  
876 (2016).
- 877 28 Ran, F. A. *et al.* In vivo genome editing using Staphylococcus aureus Cas9. *Nature* **520**,  
878 186-191, doi:10.1038/nature14299 (2015).
- 879 29 Dong, A. H., K., Dudok, B.; Farrell, JS.; Guan, W.; Liput, DJ.; Puhl, HL.; Cai, R.; Duan,  
880 J.; Albarran, E.; Ding, J.; Lovinger, DM.; Li, B.; Soltesz, I.; Li Y. A fluorescent sensor  
881 for spatiotemporally resolved endocannabinoid dynamics in vitro and in vivo. *bioRxiv*,  
882 doi:10.1101/2020.10.08.329169 (2020).
- 883 30 Farrell, J. S. *et al.* In vivo endocannabinoid dynamics at the timescale of physiological  
884 and pathological neural activity. *Neuron* **109**, 2398-2403 e2394,  
885 doi:10.1016/j.neuron.2021.05.026 (2021).
- 886 31 Meng, C. *et al.* Spectrally Resolved Fiber Photometry for Multi-component Analysis of  
887 Brain Circuits. *Neuron* **98**, 707-717 e704, doi:10.1016/j.neuron.2018.04.012 (2018).
- 888 32 Fernandez-Suarez, D. *et al.* Monoacylglycerol lipase inhibitor JZL184 is neuroprotective  
889 and alters glial cell phenotype in the chronic MPTP mouse model. *Neurobiol Aging* **35**,  
890 2603-2616, doi:10.1016/j.neurobiolaging.2014.05.021 (2014).

- 891 33 Beeler, J. A. *et al.* Dopamine-dependent motor learning: insight into levodopa's long-  
892 duration response. *Ann Neurol* **67**, 639-647, doi:10.1002/ana.21947 (2010).
- 893 34 Kupferschmidt, D. A., Juczewski, K., Cui, G., Johnson, K. A. & Lovinger, D. M.  
894 Parallel, but Dissociable, Processing in Discrete Corticostriatal Inputs Encodes Skill  
895 Learning. *Neuron* **96**, 476-489 e475, doi:10.1016/j.neuron.2017.09.040 (2017).
- 896 35 Yin, H. H. *et al.* Dynamic reorganization of striatal circuits during the acquisition and  
897 consolidation of a skill. *Nat Neurosci* **12**, 333-341, doi:10.1038/nn.2261 (2009).
- 898 36 Costa, R. M., Cohen, D. & Nicolelis, M. A. Differential corticostriatal plasticity during  
899 fast and slow motor skill learning in mice. *Curr Biol* **14**, 1124-1134,  
900 doi:10.1016/j.cub.2004.06.053 (2004).
- 901 37 Dawson, T. M., Ko, H. S. & Dawson, V. L. Genetic animal models of Parkinson's  
902 disease. *Neuron* **66**, 646-661, doi:10.1016/j.neuron.2010.04.034 (2010).
- 903 38 Gonzalez-Mariscal, I. *et al.* Absence of cannabinoid 1 receptor in beta cells protects  
904 against high-fat/high-sugar diet-induced beta cell dysfunction and inflammation in  
905 murine islets. *Diabetologia* **61**, 1470-1483, doi:10.1007/s00125-018-4576-4 (2018).
- 906 39 Fangmiao Sun, J. Z., Bing Dai, Tongrui Qian, Jianzhi Zeng, Xuelin Li, Yizhou Zhuo,  
907 Yajun Zhang, Ke Tan, Jiesi Feng, Hui Dong, Cheng Qian, Dayu Lin, Guohong Cui,  
908 Yulong Li. New and improved GRAB fluorescent sensors for monitoring dopaminergic  
909 activity in vivo. *bioRxiv*, doi:bioRxiv preprint doi:  
910 <https://doi.org/10.1101/2020.03.28.013722> (2020).
- 911 40 Sun, F. *et al.* Next-generation GRAB sensors for monitoring dopaminergic activity in  
912 vivo. *Nat Methods*, doi:10.1038/s41592-020-00981-9 (2020).
- 913 41 Chagas, M. H. *et al.* Effects of cannabidiol in the treatment of patients with Parkinson's  
914 disease: an exploratory double-blind trial. *J Psychopharmacol* **28**, 1088-1098,  
915 doi:10.1177/0269881114550355 (2014).
- 916 42 Pisani, A. *et al.* High endogenous cannabinoid levels in the cerebrospinal fluid of  
917 untreated Parkinson's disease patients. *Ann Neurol* **57**, 777-779, doi:10.1002/ana.20462  
918 (2005).
- 919 43 Di Marzo, V., Hill, M. P., Bisogno, T., Crossman, A. R. & Brotchie, J. M. Enhanced  
920 levels of endogenous cannabinoids in the globus pallidus are associated with a reduction  
921 in movement in an animal model of Parkinson's disease. *FASEB J* **14**, 1432-1438,  
922 doi:10.1096/fj.14.10.1432 (2000).
- 923 44 Burbulla, L. F. *et al.* Dopamine oxidation mediates mitochondrial and lysosomal  
924 dysfunction in Parkinson's disease. *Science* **357**, 1255-1261,  
925 doi:10.1126/science.aam9080 (2017).
- 926 45 Bloomfield, M. A., Ashok, A. H., Volkow, N. D. & Howes, O. D. The effects of  
927 Delta(9)-tetrahydrocannabinol on the dopamine system. *Nature* **539**, 369-377,  
928 doi:10.1038/nature20153 (2016).
- 929 46 French, E. D., Dillon, K. & Wu, X. Cannabinoids excite dopamine neurons in the ventral  
930 tegmentum and substantia nigra. *Neuroreport* **8**, 649-652, doi:10.1097/00001756-  
931 199702100-00014 (1997).
- 932 47 Evans, R. C., Zhu, M. & Khaliq, Z. M. Dopamine Inhibition Differentially Controls  
933 Excitability of Substantia Nigra Dopamine Neuron Subpopulations through T-Type  
934 Calcium Channels. *J Neurosci* **37**, 3704-3720, doi:10.1523/JNEUROSCI.0117-17.2017  
935 (2017).

- 936 48 Gantz, S. C. & Bean, B. P. Cell-Autonomous Excitation of Midbrain Dopamine Neurons  
937 by Endocannabinoid-Dependent Lipid Signaling. *Neuron* **93**, 1375-1387 e1372,  
938 doi:10.1016/j.neuron.2017.02.025 (2017).
- 939 49 Kelly, R., Joers, V., Tansey, M. G., McKernan, D. P. & Dowd, E. Microglial Phenotypes  
940 and Their Relationship to the Cannabinoid System: Therapeutic Implications for  
941 Parkinson's Disease. *Molecules* **25**, doi:10.3390/molecules25030453 (2020).
- 942 50 Jehle, J. *et al.* Myeloid-Specific Deletion of Diacylglycerol Lipase alpha Inhibits  
943 Atherogenesis in ApoE-Deficient Mice. *PLoS One* **11**, e0146267,  
944 doi:10.1371/journal.pone.0146267 (2016).
- 945 51 Hsu, K. L. *et al.* DAGLbeta inhibition perturbs a lipid network involved in macrophage  
946 inflammatory responses. *Nat Chem Biol* **8**, 999-1007, doi:10.1038/nchembio.1105  
947 (2012).
- 948 52 Hughes, A. J., Daniel, S. E., Kilford, L. & Lees, A. J. Accuracy of clinical diagnosis of  
949 idiopathic Parkinson's disease: a clinico-pathological study of 100 cases. *Journal of*  
950 *neurology, neurosurgery, and psychiatry* **55**, 181-184 (1992).
- 951 53 Postuma, R. B. *et al.* MDS clinical diagnostic criteria for Parkinson's disease. *Mov*  
952 *Disord* **30**, 1591-1601, doi:10.1002/mds.26424 (2015).
- 953 54 Shi, C. H. *et al.* PLA2G6 gene mutation in autosomal recessive early-onset parkinsonism  
954 in a Chinese cohort. *Neurology* **77**, 75-81, doi:10.1212/WNL.0b013e318221acd3 (2011).
- 955 55 McKenna, A. *et al.* The Genome Analysis Toolkit: a MapReduce framework for  
956 analyzing next-generation DNA sequencing data. *Genome Res* **20**, 1297-1303,  
957 doi:10.1101/gr.107524.110 (2010).
- 958 56 Wang, K., Li, M. & Hakonarson, H. ANNOVAR: functional annotation of genetic  
959 variants from high-throughput sequencing data. *Nucleic Acids Res* **38**, e164,  
960 doi:10.1093/nar/gkq603 (2010).
- 961 57 Yang, H. & Wang, K. Genomic variant annotation and prioritization with ANNOVAR  
962 and wANNOVAR. *Nat Protoc* **10**, 1556-1566, doi:10.1038/nprot.2015.105 (2015).
- 963 58 Sun, Q. Y. *et al.* Expansion of GGC repeat in the human-specific NOTCH2NLC gene is  
964 associated with essential tremor. *Brain* **143**, 222-233, doi:10.1093/brain/awz372 (2020).
- 965 59 Tian, Y. *et al.* Expansion of Human-Specific GGC Repeat in Neuronal Intranuclear  
966 Inclusion Disease-Related Disorders. *Am J Hum Genet* **105**, 166-176,  
967 doi:10.1016/j.ajhg.2019.05.013 (2019).
- 968 60 Han, H. *et al.* PINK1 phosphorylates Drp1(S616) to regulate mitophagy-independent  
969 mitochondrial dynamics. *EMBO Rep*, e48686, doi:10.15252/embr.201948686 (2020).
- 970 61 Liu, G. *et al.* Aldehyde dehydrogenase 1 defines and protects a nigrostriatal  
971 dopaminergic neuron subpopulation. *The Journal of clinical investigation* **124**, 3032-  
972 3046, doi:10.1172/JCI72176 (2014).
- 973 62 Chen, X. *et al.* Parkinson's disease-related Leucine-rich repeat kinase 2 modulates  
974 nuclear morphology and genomic stability in striatal projection neurons during aging.  
975 *Mol Neurodegener* **15**, 12, doi:10.1186/s13024-020-00360-0 (2020).
- 976 63 Wheeler, M. A. *et al.* Genetically targeted magnetic control of the nervous system. *Nat*  
977 *Neurosci* **19**, 756-761, doi:10.1038/nn.4265 (2016).
- 978 64 Lin, X. *et al.* Conditional expression of Parkinson's disease-related mutant alpha-  
979 synuclein in the midbrain dopaminergic neurons causes progressive neurodegeneration  
980 and degradation of transcription factor nuclear receptor related 1. *The Journal of*



981            *neuroscience : the official journal of the Society for Neuroscience* **32**, 9248-9264,  
982            doi:10.1523/JNEUROSCI.1731-12.2012 (2012).  
983    65        Gunduz-Cinar, O. *et al.* Convergent translational evidence of a role for anandamide in  
984            amygdala-mediated fear extinction, threat processing and stress-reactivity. *Mol*  
985            *Psychiatry* **18**, 813-823, doi:10.1038/mp.2012.72 (2013).  
986

987 **Figures and Figure Legends**

988 **Figure 1**

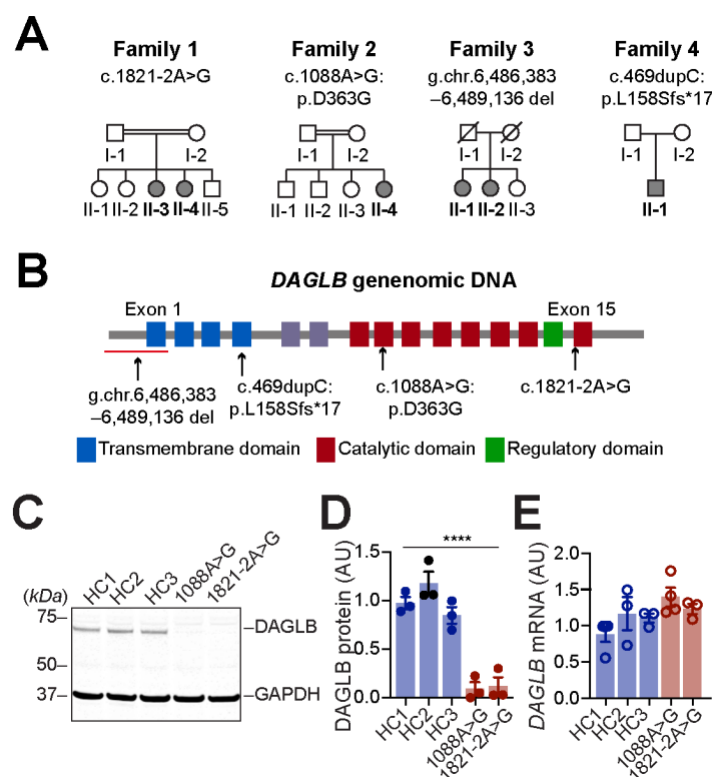

989  
 990 **Fig. 1 Identification of homozygous *DAGLB* mutations in affected families.** (A) Pedigrees are  
 991 shown for the four affected families. A double bar represents parental consanguinity. Slash  
 992 indicates deceased individuals. Males are represented by squares, females by circles and affected  
 993 individuals by shading. (B) Schematic view of *DAGLB* gene structure and encoded protein  
 994 domains. The four transmembrane segments are shown in blue, and the catalytic domain in  
 995 maroon. Within the catalytic domain a regulatory loop is colored in green. Variant sites are  
 996 indicated by arrows. (C-E) Representative western blot (C) and quantification of *DAGLB* protein  
 997 (D) and mRNA (E) levels in fibroblasts derived from Family 1 II-3, Family 2 II-4 and three age-  
 998 matched HCs. Data were normalized to glyceraldehyde 3-phosphate dehydrogenase (GAPDH)  
 999 protein or mRNA levels as appropriate and represent mean  $\pm$  SEM. \*\*\*\*  $p < 0.0001$ .

1000 **Figure 2**  
1001

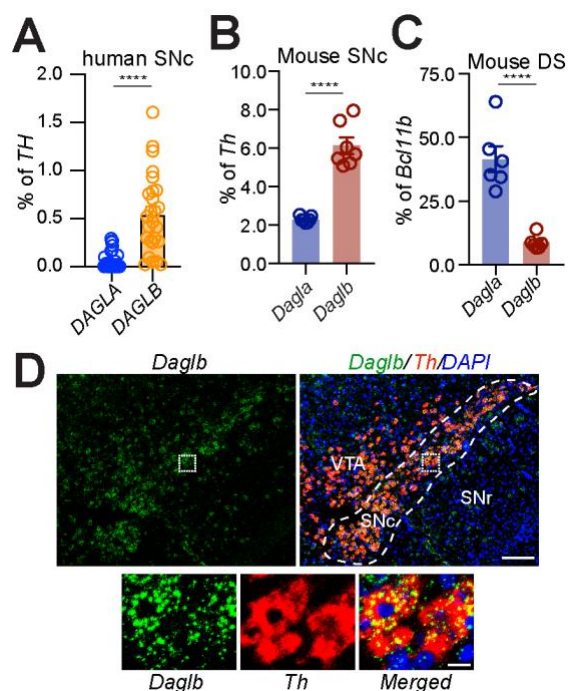

1002 **Fig. 2 DAGLB is the main 2-AG synthase expressed by the nigral DANs.** (A) Quantification  
1003 of *DAGLA* and *DAGLB* mRNA expression by RNA-sequencing of LCM-isolated human nigral  
1004 DAN samples (n=26)<sup>27</sup>. (B) Quantification of *Dagla* and *Daglb* mRNA expression by RNA-  
1005 sequencing of LCM-isolated nigral DANs from adult mouse brains (n = 7). (C) *Dagla* and *Daglb*  
1006 mRNA expression in the mouse dorsal striatum (DS, n=6). The expression of *Dagla* and *Daglb*  
1007 mRNAs was normalized by the expression of *Th* mRNAs in the nigral DANs and *Bcl11b*  
1008 mRNAs in the SPNs. Data were presented as mean ± SEM. \*\*\*\**p*<0.0001. (D) RNAscope<sup>®</sup> *in situ*  
1009 hybridization of *Daglb* and *Th* in mouse midbrain sections. Sections were counterstained with  
1010 DAPI. Dashed line outlines the SNc region. Right panels highlight the boxed areas in the left  
1011 panels. SNc: substantia nigra pars compacta. SNr: substantia nigra pars reticulata. VTA: ventral  
1012 tegmental area. Scale bars: 100 μm (left) and 20 μm (right).  
1013  
1014  
1015  
1016

1017  
1018

**Figure 3**

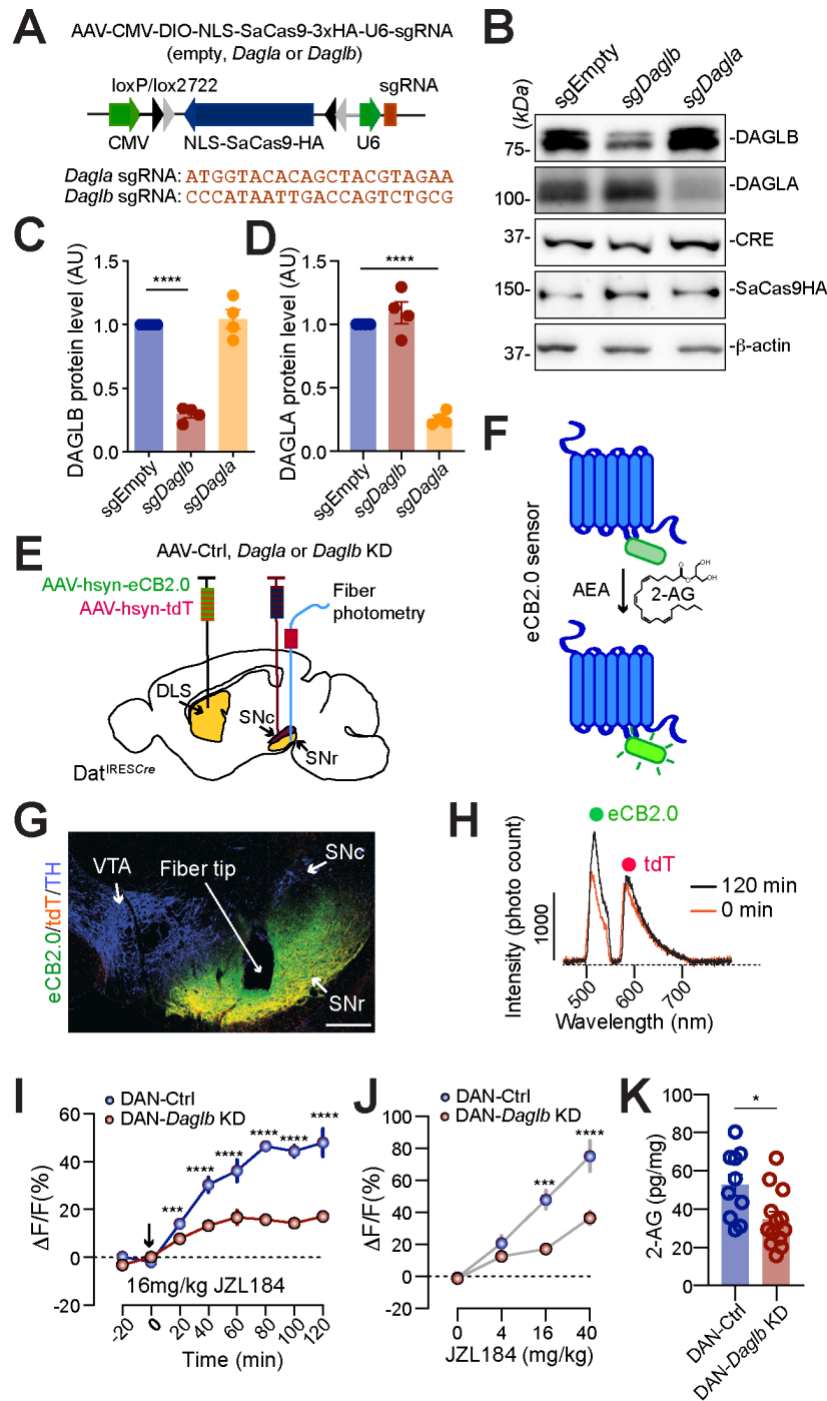

1019

1020 **Fig. 3 DAGLB mediates the main 2-AG synthesis in the nigral DANs.** (A) Diagram of AAV-  
1021 mediated CRISPR/saCas9 gene targeting vector and the sequence of *Dagla* and *Daglb* sgRNAs.  
1022 (B) Western blot of DAGLB in cultured cortical and hippocampal neurons transfected with  
1023 control, *Dagla*, or *Daglb* KD AAV vectors in combination with Cre-expressing AAV vectors.  
1024 Actin was used as a loading control. (C, D) Bar graph quantifies DAGLB (C) and DAGLA (D)  
1025 protein levels in four independent experiments. Data were presented as mean  $\pm$  SEM. Tukey's  
1026 multiple comparison test, \*\*\*\* $p < 0.0001$ . (E) Schematic illustrates fiber photometry imaging of 2-  
1027 AG signals in the SN of DAN-control and DAN-*Daglb* KD mice. DLS: dorsolateral striatum. (F)  
1028 Cartoon of eCB sensor eCB2.0. (G) Co-staining of eCB2.0, tdT and TH in the midbrain sections  
1029 of DAN-*Daglb* KD mice. Scale bar: 100  $\mu$ m. (H) Sample photon counts of eCB2.0 (wavelength:  
1030 500-540nm) and tdT (wavelength: 575-650nm) emission immediately before and 120 min after  
1031 JZL184 (16mg/kg) administration. (I) Time course of eCB2.0 signals in the SN of DAN-control  
1032 [n=4, 2Male(M)/2Female(F)] and DAN-*Daglb* KD (n=4, 2M/2F) mice before and after JZL184  
1033 (16mg/kg) treatment. Data were presented as mean  $\pm$  SEM. Sidak's multiple comparison test.  
1034 \*\*\* $p = 0.0001$ . \*\*\*\* $p < 0.0001$ . (J) Dose response of eCB2.0 signals 120 min after JZL  
1035 administration at 0 (vehicle only), 4, 16, and 40mg/kg. n=4 mice per group. Data were presented  
1036 as mean  $\pm$  SEM. Sidak's multiple comparison test. \*\*\* $p = 0.0003$ . \*\*\*\* $p < 0.0001$ . (K) LC-MS/MS  
1037 quantification of 2-AG in the SNc of DAN-control (n=10) and DAN-*Daglb* KD (n=14) mice.  
1038 Data were presented as mean  $\pm$  SEM. Unpaired t test, \* $p = 0.01$ .

1039 **Figure 4**  
1040

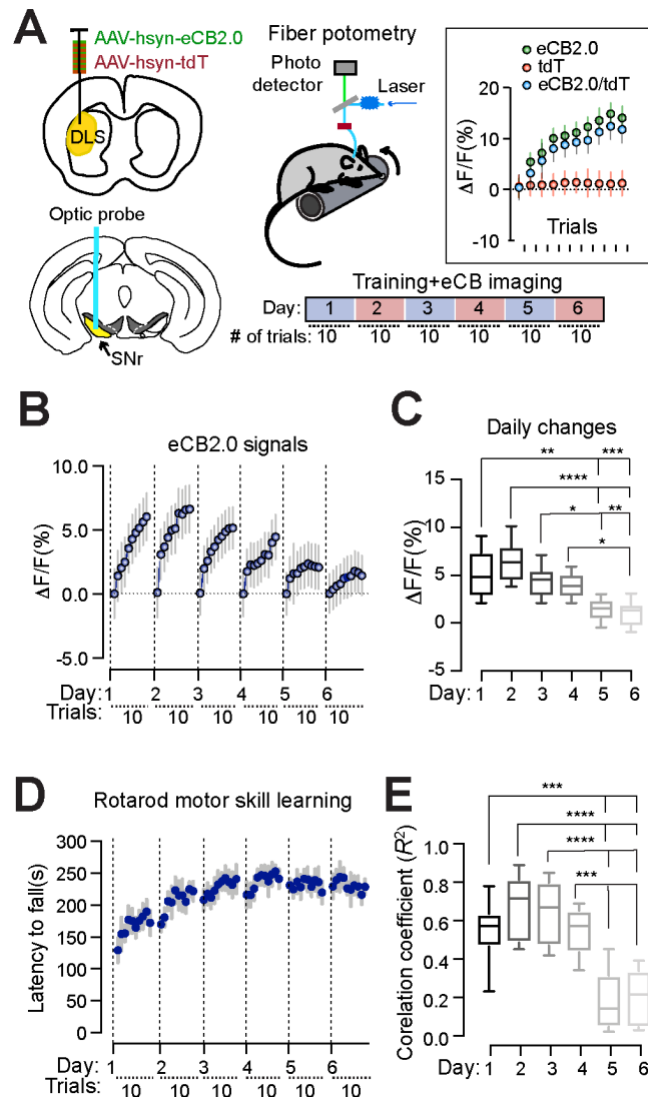

1041  
1042

1043 **Fig. 4 DAGLB-mediated 2-AG biosynthesis in the nigral DANs is involved in motor skill**  
1044 **learning.** (A) Schematic diagram of eCB2.0 fiber photometry recoding while mice undergo  
1045 rotarod motor skill training. Inset shows the average eCB2.0 (green), tdT (red) and normalized  
1046 eCB2.0 (blue) signals during each trial from a mouse on day 2 of the 6-day training paradigm.  
1047 Data were presented as mean  $\pm$  SD. (B) Normalized eCB2.0 signal intensity during the motor  
1048 learning. n=8 (4M/4F). Data were presented as mean  $\pm$  SD. (C) Box and whiskers plot (min to  
1049 max) of maximal daily increase of eCB2.0 signal intensity. n=8 (4M/4F). Tukey's multiple  
1050 comparisons test. \* $p=0.02$ , \*\* $p=0.001$ , \*\*\* $p=0.0003$ , \*\*\*\* $p<0.0001$ . (D) Performance of rotarod  
1051 motor skill training. n=8 (4M/4F). Data were presented as mean  $\pm$  SEM. (E) Box and whiskers  
1052 plot (min to max) of correlation coefficient of eCB2.0 signal intensity and rotarod performance.  
1053 n=8 (4M/4F). Tukey's multiple comparisons test. \*\*\* $p=0.0002$  to  $0.0006$ , \*\*\*\* $p<0.0001$ .

1054 **Figure 5**  
1055

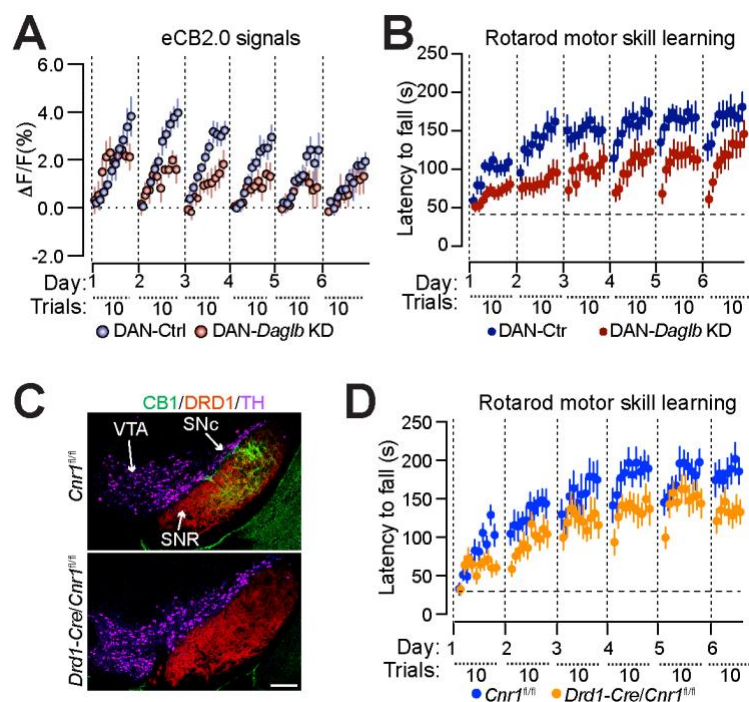

1056  
1057

1058 **Fig. 5 DAGLB-deficiency in nigral DANs compromises the early dynamic release of 2-AG**  
 1059 **and impairs rotarod motor skill learning.** (A) Normalized eCB2.0 signal intensity over the  
 1060 course of motor learning of DAN-control and DAN-*Daglb* KD (n=5M per genotype) mice. Data  
 1061 were presented as mean  $\pm$  SEM. (B) Rotarod motor skill training of DAN-control (n=16, 8M/8F)  
 1062 and DAN-*Daglb* KD (n=16, 8M/8F) mice. Data were presented as mean  $\pm$  SEM. (C) Co-staining  
 1063 of CB1 (green), DRD1 (red) and TH (purple) in the midbrain sections of homozygous floxed  
 1064 CB1 (*Cnr1*<sup>fl/fl</sup>) and *Drd1-Cre/Cnr1*<sup>fl/fl</sup> mice. Scale bar: 100  $\mu$ m. (D) Rotarod motor skill training  
 1065 of *Cnr1*<sup>fl/fl</sup> (n=14, 7M/7F) and *Drd1-Cre/Cnr1*<sup>fl/fl</sup> (n=12, 6M/6F) mice. Data were presented as  
 1066 mean  $\pm$  SEM.

1067 **Figure 6**

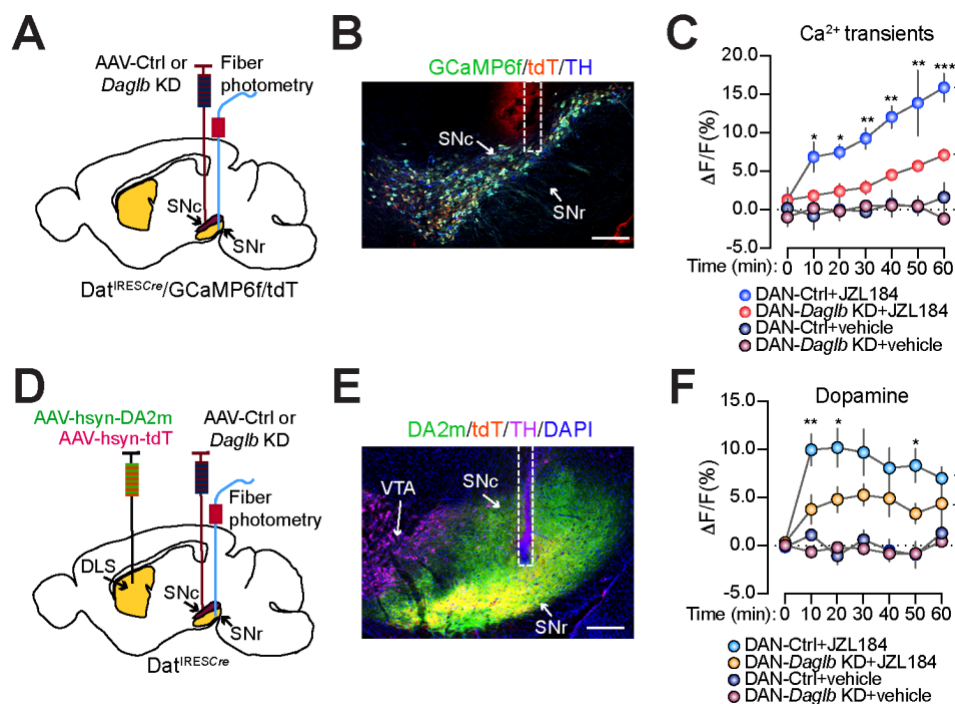

1068  
 1069 **Fig. 6 JZL184 treatment promotes DAN activity and dopamine release.** (A) Schematic  
 1070 illustrates fiber photometry imaging of GCaMP6f and tdT signals in the SNc of DAN-control  
 1071 and DAN-*Daglb* KD *Dat*<sup>IRESCre</sup>/GCaMP6f/tdT trigenic mice. (B) Representative images of  
 1072 GCaMP6f (green), tdT (red) and TH (blue) staining. Scale bar: 200 $\mu$ m. (C) Alterations of  
 1073 calcium transients in the SNc of DAN-control and DAN-*Daglb* KD *Dat*<sup>IRESCre</sup>/GCaMP6f/tdT  
 1074 trigenic mice (n=3M per genotype) treated with vehicle or JZL184 (20mg/kg). Data were  
 1075 presented as mean  $\pm$  SEM. Multiple *t* test. \**p*<0.05, \*\**p*<0.01, \*\*\**p*<0.001. (D) Schematic  
 1076 illustrates fiber photometry imaging of DA2m and tdT signals in the SN of DAN-control and  
 1077 DAN-*Daglb* KD mice. (E) Representative images of DA2m (green), tdT (red) and TH  
 1078 (magenta) staining. Scale bar: 200 $\mu$ m. (F) Changes of dopamine release in the SN of DAN-  
 1079 control (n=5M) and DAN-*Daglb* KD (n=4M) mice treated with vehicle, JZL184 (20mg/kg).  
 1080 Data were presented as mean  $\pm$  SEM. Multiple *t* test. \**p*<0.05, \*\**p*<0.01.



1081 **Figure 7**

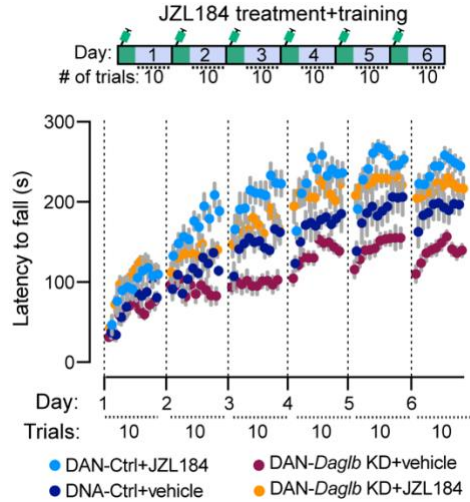

1082  
1083

1084 **Fig. 7 JZL184 treatment rescues the motor skill learning impairments of DAN-*Daglb* KD**  
1085 **mice.** Rotarod motor skill learning of DAN-control ( $n_{\text{vehicle}}=7$ , 4M/3F;  $n_{\text{JZL184}}=10$ , 5M/5F) and  
1086 DAN-*Daglb* KD ( $n_{\text{vehicle}}=11$ , 6M/5F;  $n_{\text{JZL184}}=12$ , 6M/6F) mice treated with vehicle or JZL184  
1087 (20mg/kg).
